1 **Oxidative stress induces inflammation of lens cells and triggers immune surveillance of ocular tissues**

2 Brian Thompson<sup>1</sup>, Emily A. Davidson<sup>1,2</sup>, Ying Chen<sup>1</sup>, David J. Orlicky<sup>3</sup>, David C. Thompson<sup>1,4</sup>, Vasilis Vasiliou<sup>1\*</sup>

3

4 <sup>1</sup> Department of Environmental Health Sciences, Yale School of Public Health, Yale University, 60 College Street, New  
5 Haven, CT, USA.

6 <sup>2</sup> Department of Cellular & Molecular Physiology, Yale School of Medicine, Yale University, New Haven, CT, USA.

7 <sup>3</sup> Department of Pathology, Anschutz School of Medicine, University of Colorado, Aurora, CO, USA.

8 <sup>4</sup> Department of Clinical Pharmacy, Skaggs School of Pharmacy and Pharmaceutical Sciences, University of Colorado  
9 Denver, Aurora, CO, USA.

10 \* Corresponding author [vasilis.vasiliou@yale.edu](mailto:vasilis.vasiliou@yale.edu)

11

12

13

14

15

16

17

18

19

20

21

22

23

24

25

26

27

## Abstract:

Recent reports have challenged the notion that the lens is immune-privileged. However, these studies have not fully identified the molecular mechanism(s) that promote immune surveillance of the lens. Using a mouse model of targeted glutathione (GSH) deficiency in ocular surface tissues, we have investigated the role of oxidative stress in upregulating cytokine expression and promoting immune surveillance of the eye. RNA-sequencing of lenses from postnatal day (P) 1- aged *Gclc<sup>fl/fl</sup>;Le-Cre<sup>Tg</sup>/-* (KO) and *Gclc<sup>fl/fl</sup>;Le-Cre<sup>-/-</sup>* control (CON) mice revealed upregulation of many cytokines (e.g., CCL4, GDF15, CSF1) and immune response genes in the lenses of KO mice. The eyes of KO mice had a greater number of cells in the aqueous and vitreous humors at P1, P20 and P50 than age-matched CON and *Gclc<sup>w/w</sup>;Le-Cre<sup>Tg</sup>/-* (CRE) mice. Histological analyses revealed the presence of innate immune cells (i.e., macrophages, leukocytes) in ocular structures of the KO mice. At P20, the expression of cytokines and ROS content was higher in the lenses of KO mice than in those from age-matched CRE and CON mice, suggesting that oxidative stress may induce cytokine expression. *In vitro* administration of the oxidant, hydrogen peroxide, and the depletion of GSH (using buthionine sulfoximine (BSO)) in 21EM15 lens epithelial cells induced cytokine expression, an effect that was prevented by co-treatment of the cells with *N*-acetyl-L-cysteine (NAC), a antioxidant. The *in vivo* and *ex vivo* induction of cytokine expression by oxidative stress was associated with the expression of markers of epithelial-to-mesenchymal transition (EMT),  $\alpha$ -SMA, in lens cells. Given that EMT of lens epithelial cells causes posterior capsule opacification (PCO), we propose that oxidative stress induces cytokine expression, EMT and the development of PCO in a positive feedback loop. Collectively these data indicate that oxidative stress induces inflammation of lens cells which promotes immune surveillance of ocular structures.

**Keywords:** Microphthalmia, Inflammation, Ocular Immune System, Glutathione, Lens, Oxidative Stress

### Highlights:

- Immune surveillance of ocular structures occurs in mouse eyes deficient in glutathione.
- Oxidative stress upregulates the expression of pro-inflammatory cytokines (e.g., GDF15, CSF1) in lens cells *in vitro* and *in vivo*.
- The upregulation of cytokines in lens cells is associated with markers of an epithelial-to-mesenchymal transition phenotype.
- Oxidative stress-induced inflammation and associated epithelial-to-mesenchymal transition may play a role in the development of posterior capsule opacification.

## 60 Introduction

61 The lens, an avascular tissue surrounded by a thick basement membrane, has a unique relationship with the immune  
62 system. The lens is connected to the vascular and lymphatic systems throughout early eye development *via* the hyaloid  
63 vasculature, a temporary branch of the ophthalmic artery [1, 2]. Shortly after birth, the hyaloid vasculature regresses in a  
64 process mediated by macrophages [3, 4]. Notably, macrophages are also involved in the removal of apoptotic epithelial  
65 cells prior to lens cavity closure [5]. Following regression of the hyaloid vasculature and closure of the lens cavity, the lens  
66 has been thought to be immune-privileged, i.e., tolerant to the placement of allografts within the eye.

67 Several recent experimental results have challenged this dogma. First, the deletion of a cell-cell adhesion protein abundant  
68 in lens cells, N-cadherin, in the developing lens impairs lens development and induces immune surveillance of the lens  
69 and other ocular structures (i.e., cornea, vitreous humor, retina) from as early as embryonic day (E) 18.5 [6]. Second,  
70 following cataract surgery in mice, the expression of many cytokines is increased in lens epithelial cells prior to infiltration  
71 of immune cells into the remnant lens capsule [7]. Third, the zonule fibers that are connected to the lens provide a conduit  
72 for the trafficking of immune cells to the lens [6, 8, 9]. Fourth, damage to the cornea induces surveillance of the lens by  
73 immune cells [8]. Lastly, the chicken, mouse and human lens epithelium contain resident immune cells [9]. Despite this  
74 mounting evidence, the molecular mechanism(s) responsible for promoting immune surveillance of the lens remain to be  
75 elucidated.

76 Oxidative stress manifests as a result of an imbalance between antioxidants and oxidants (e.g., reactive oxygen species  
77 (ROS)) such that oxidants prevail [10]. Oxidative stress stimulates inflammation by activating the NF- $\kappa$ B signaling pathway  
78 [11, 12] and serving as a secondary messenger for the pro-inflammatory cytokine TNF $\alpha$  [13], thus ROS both stimulates and  
79 mediates inflammation. ROS is generated in the lens by a myriad of exogenous (e.g., radiation, pharmaceutical drugs,  
80 cigarette smoke) and endogenous (e.g., NADPH oxidases, cellular respiration) sources [14, 15], and may also be generated  
81 by infiltrating leukocytes [16]. Oxidative stress contributes to a common complication of cataract surgery, posterior  
82 capsule opacification (PCO) [17], which is characterized by the epithelial-to-mesenchymal transition of the lens epithelial  
83 cells that remain following cataract surgery [18-20].

84 In the present study, we describe that oxidative stress can induce an inflammatory response in lens epithelial cells. We  
85 report that the lens-specific deletion of *Glutamate-Cysteine Ligase Catalytic Subunit (Gclc)*, a gene that encodes the rate-  
86 limiting enzyme in the biosynthesis of GSH, results in oxidative stress and triggers an inflammatory response that is  
87 characterized by a significant upregulation in the gene expression of several classes of cytokines in lens cells. We then  
88 replicated the system *in vitro* with cultured lens epithelial cells by treatment with buthionine sulfoximine (BSO), an  
89 irreversible glutamate cysteine ligase inhibitor, or hydrogen peroxide (H<sub>2</sub>O<sub>2</sub>) and found that this induces cytokine  
90 expression. Interestingly, treatment with BSO elicited the expression of more cytokines in these cells than did treatment  
91 with the oxidant H<sub>2</sub>O<sub>2</sub>, suggesting differential responses induced by these treatments. Lastly, we found that  
92 supplementation of lens epithelial explants with an antioxidant, *N*-acetyl-L-cysteine, reduced the expression of cytokines  
93 and prevented the induction of markers of EMT. Collectively, these results suggest that inflammation and PCO may both

94 be prevented by post-cataract treatments that include an antioxidant or the upregulation of the endogenous antioxidant  
95 systems.

## 98 **Methods**

### 99 **Mouse Lines**

100 The creation of *Gclc* control (CON), *Gclc* knockout (KO) and *Le-Cre* control (CRE) mice used in this study have been  
101 previously described [21]. Briefly, *Gclc* homozygous floxed mice [22] and *Le-Cre* hemizygous mice [23] were crossed to  
102 delete *Gclc* from the cellular precursors of the eyelid, epithelium of the cornea, conjunctiva and lens from as early as  
103 embryonic day (E) 9. Mice of the three genotypes were maintained on a C57BL/6 and FVB/N mixed background. They were  
104 group-housed (no more than 5 mice per cage) and maintained on a 12-hour light-dark cycle, with food and water available  
105 *ad libitum*. All experiments were performed in strict accordance with the National Institutes of Health guidelines, and  
106 protocols were approved by the Yale University Institutional Animal Care and Use Committee.

### 108 **RNA sequencing (RNA-seq) Library Preparation and Sequencing**

109 The RNA-seq data used in this study have been previously published [21]. Briefly, the lenses of mice aged postnatal day  
110 (P) 1 were collected from KO and CON mice (which were anesthetized by the isoflurane open drop method and euthanized  
111 by cervical dislocation) and stored in 200  $\mu$ L RNAlater solution (Invitrogen, Waltham, MA) at  $-80^{\circ}\text{C}$  until extraction. The  
112 lenses from three mice (i.e., six lenses) were pooled into a biological replicate and three biological replicates were used  
113 per genotype (i.e., 9 mice total per genotype). Total RNA was isolated from the biological replicates using the RNeasy  
114 Micro Kit (QIAGEN, Venlo, Netherlands) per the manufacturer's instructions, and the RNA integrity number (RIN) was  
115 determined using the Agilent 2100 Bioanalyzer RNA 6000 Pico assay. cDNA libraries were prepared from total RNA samples  
116 with an RIN  $\geq 8.0$  using the NEBNext<sup>®</sup> Single Cell/Low Input RNA Library Prep Kit for Illumina<sup>®</sup> (New England BioLabs). An  
117 Illumina NovaSeq 6000 machine with an S4 flow cell was used to generate pairwise 100 bp reads (performed by the Yale  
118 Center for Genome Analysis).

### 120 **RNA-seq Analysis and Bioinformatics**

121 The analysis of the RNA-seq data has been previously described in detail [21] and can be accessed at NCBI Gene Expression  
122 Omnibus (GEO) (accession number GSE175394). Briefly, all data analyses were performed using the Galaxy web platform  
123 [24] [accessed at [usegalaxy.org](http://usegalaxy.org)], with default settings used for all tools (unless otherwise stated). Read sequence qualities  
124 were determined using the FastQC tool (v0.72+galaxy1), with low quality reads being trimmed using a sliding window  
125 (phred  $\geq 20$ ), and ambiguous bases (N) and any contaminating sequencing adapters removed using the Trimmomatic tool

[25]. HISAT2 (v2.1.0+galaxy5)[26] was used to map the trimmed reads to the *Mus musculus* reference genome (GRCm38/mm10). featureCounts (v1.6.4+galaxy1) [27] was used to count mapped reads. DESeq2 (v2.11.0.6) [28] was used for differential expression analyses. Differentially-expressed genes (DEGs) were identified through satisfaction of the following criteria:  $\geq \pm 1.0 \log_2$  fold change ( $\log_2FC$ ) and adjusted P value  $< 0.05$  (Benjamini-Hochberg method[29]).

The Database for Annotation, Visualization and Integrated Discovery (DAVID) bioinformatics resource [30] was used to perform gene ontology (GO) functional annotation analysis on identified DEGs. Ingenuity Pathway Analysis (IPA) (Version 52912811, Ingenuity Systems, QIAGEN) was used to identify 'canonical pathways' in the upregulated DEGs. The cytokine-cytokine receptor interaction pathway map was generated using the KEGG Mapper program (31423653).

### **Histological Analysis of Mouse Eyes**

P1-aged mice were euthanized by swift decapitation and a piece of the tail was removed for genotyping by PCR, as previously described [22]. Mice aged P20 and P50 were anesthetized by the isoflurane open drop method, euthanized by cervical dislocation. The eyes were then rapidly enucleated and any contaminating tissues were removed. The mouse heads or eyes were fixed in Davidson's Solution for 24 hours at 4°C and subsequently stored in 70% EtOH. Yale Pathology Tissue Services (YPTS) processed the tissues for histological analysis, i.e., conducted paraffin embedding, sectioning (5  $\mu$ m thickness) and mounting onto glass slides. YPTS then either stained the resultant slides with hematoxylin and eosin (H&E) or subjected them to immunohistochemical analysis (per their standard protocols). At least two H&E-stained sections from the eyes of three CON, CRE or KO mice (aged P1, P20 or P50) were imaged with a Nikon Eclipse E200 microscope with an Axiocam 503 camera (Zeiss) attached and the number of cells within the aqueous and vitreous humors were counted using the NIH Image J software [31]. Cell counts are presented as means and associated standard deviation.

### **Cell Culture**

The mouse lens epithelial cell line, 21EM15, was obtained from Dr. Salil Lachke (Department of Biological Sciences, University of Delaware). Cells were cultured in Dulbecco's Modified Eagle Medium (DMEM) (Thermo Fisher Scientific Inc., MA) supplemented with 10% fetal bovine serum (Sigma-Aldrich, MO), 1% antibiotic-antimycotic (Sigma-Aldrich, St. Louis, MO) and 1% MEM non-essential amino acids (Sigma-Aldrich, MO) in 60 mm dishes (Corning, NY) in a humidified atmosphere of 5% CO<sub>2</sub> in air at 37°C. Cells were treated with 500  $\mu$ M BSO (Sigma-Aldrich, MO) for 48 hours or with 25  $\mu$ M hydrogen peroxide (Cole Palmer, IL) for 24 hours to induce oxidative stress [32, 33]. In other experiments, cells were concomitantly treated with 10 mM *N*-acetyl-L-cysteine (Sigma-Aldrich, MO) and 500  $\mu$ M BSO for 48 hours. At the end of the treatment period, cells were rinsed once with phosphate buffered saline (PBS, Gibco, MA) and removed from the culture dish by a 3-minute treatment with 0.05% trypsin (Gibco, MA) and the trypsin neutralized with equal parts cell culture medium. The disassociated cells were transferred to a 1.5 mL microcentrifuge tube (Eppendorf, Hamburg, Germany) and a cell pellet was generated by centrifugation at 500 g for 3 min at room temperature. The cell culture media was aspirated from the cell pellet and the pellet was washed twice with room temperature PBS by gently resuspending

160 the cell pellet in PBS, centrifugation at 500 g for 3 min at room temperature, and aspiration of the PBS. After the final  
161 wash, the cell pellet was stored in 100  $\mu$ L of PBS at  $-80^{\circ}\text{C}$  for latter analysis.

## 163 **Lens Epithelial Explant Establishment**

164 *Gclc<sup>w/w</sup>* mice aged P20 were used for the establishment of lens epithelial explants, as previously described [34, 35]. Briefly,  
165 mice were anesthetized, euthanized and their eyes enucleated as described in the histological analysis section (above).  
166 The lenses were removed and placed into a 35 mm culture dish (Corning, NY) containing pre-warmed ( $37^{\circ}\text{C}$ ) Medium 199  
167 supplemented with 0.1% fetal bovine serum (Sigma-Aldrich, MO), 1% antibiotic-antimycotic (Sigma-Aldrich, St. Louis, MO)  
168 or Medium 199 supplemented with 0.1% fetal bovine serum (Sigma-Aldrich, MO), 1% antibiotic-antimycotic (Sigma-  
169 Aldrich, St. Louis, MO), and 10 mM NAC (Thermo Fisher Scientific). A hole was made at the posterior pole, the lens capsule  
170 opened, and the fiber cells gently removed. The lens capsule was pinned to the bottom of the culture dish such that the  
171 adherent epithelial cells were exposed to the medium. Explants were then individually cultured in a humidified  
172 atmosphere of 5%  $\text{CO}_2$  at  $37^{\circ}\text{C}$  for 24 hours. Six explants were pooled to make one sample and 3 pooled samples were  
173 used for each experimental condition (hence a total of 18 mice were used per condition).

## 175 **RNA Isolation and RT-qPCR**

### 176 *RNA isolation from mouse lenses*

177 Three CON, CRE and KO mice aged P20 were anesthetized by the isoflurane open drop method, euthanized by cervical  
178 dislocation and lenses dissected. Dissected lenses were immediately placed in 100  $\mu$ L RNAlater solution (Thermo Fisher  
179 Scientific), flash frozen in liquid nitrogen and stored at  $-80^{\circ}\text{C}$  until processing. Total RNA was isolated from the mouse  
180 lenses using the RNeasy Plus Micro Kit (QIAGEN, Venlo, Netherlands) per the manufacturer's instructions. Briefly, the  
181 lenses were removed from the RNAlater solution, placed in 350  $\mu$ L RLT Plus buffer (QIAGEN, Venlo, Netherlands), and total  
182 RNA was isolated per the manufacturer's instructions.

### 183 *RNA isolation from 21EM15 cells*

184 Total RNA was isolated from the 21EM15 cells using the RNeasy Plus Mini Kit (QIAGEN, Venlo, Netherlands) per the  
185 manufacturer's instructions. Each harvested cell pellet was resuspended in 600  $\mu$ L RLT Plus Buffer and were lysed with a  
186 TissueLyser (QIAGEN, Venlo, Netherlands) at a frequency of 30 Hz for 2 min at  $4^{\circ}\text{C}$ . Total RNA was isolated per the  
187 manufacturers instructions.

### 188 *RNA isolation from lens epithelial explants*

189 Lens epithelial explants (6 explants per experiment per condition) from three independent experiments (i.e., 18 explants  
190 total per experimental condition) were placed in were placed in 100  $\mu$ L RNAlater solution, flash frozen in liquid nitrogen

191 and stored at -80°C until processing. Total RNA was isolated from these explants using the RNeasy Plus Micro Kit (QIAGEN,  
192 Venlo, Netherlands) per the manufacturer's instructions.

### 193 *RT-qPCR*

194 Each total RNA sample was quantified and analyzed for purity using a spectrophotometer (Nanodrop ND-1000). Five  
195 hundred ng of total RNA (from 21EM15 cells or mouse lenses) or 10 ng of total RNA (from explants) were reverse  
196 transcribed using the iScript cDNA Synthesis Kit (Bio-Rad, CA) per the manufacturer's instructions. One ng of cDNA from  
197 the explants was then pre-amplified using the Quantabio PerfeCTa PreAmp Supermix (Quantabio, MA) with the same  
198 primers as used for qPCR (per the manufacturer's instructions) and diluted 20-fold. Ten ng of cDNA from the 21EM15 cells,  
199 1  $\mu$ L of preamplified cDNA from the explants or 75 ng of cDNA from the lenses was then used to estimate the abundance  
200 of specific mRNA transcripts using the iTaq Universal SYBR Green Supermix (Bio-Rad, CA) on a CFX96 Real-Time PCR System  
201 (Bio-Rad, CA). Relative mRNA transcript abundance was estimated using the  $\Delta$ Ct method [36] with the housekeeping gene,  
202 GAPDH, used as an internal normalization control for each sample. Primer sequences used are provided in Supplemental  
203 Table 1.

### 205 **Analysis of ROS levels**

206 ROS levels were assayed as previously described [37]. Briefly, three P20-aged CON, CRE and KO mice were anesthetized  
207 by the isoflurane open drop method, euthanized by cervical dislocation and lenses dissected. The two freshly isolated  
208 lenses from each animal were placed into a single 96-well plate containing 200  $\mu$ L Medium 199 (Sigma-Aldrich) maintained  
209 at 4°C. Dihydrorhodamine 123 (DHR) (7.5  $\mu$ M) (Invitrogen, MA), a colorless stain that easily passes through membranes  
210 and is oxidized by ROS into rhodamine 123, and 1 drop of NucBlue Live Ready Probe (Hoescht 33342, Thermo Fisher  
211 Scientific, MA) were added to each well and incubated at 4°C for 30 minutes. Stained lenses were washed three times in  
212 4°C Medium 199 and then 200  $\mu$ L 4°C PBS (Gibco, MA) was added to each well prior to measuring DHR fluorescence  
213 intensity at Ex/Em of 507/529 nm and Hoescht 33342 at Ex/Em of 360/460 nm with a microplate reader (Spectramax M3,  
214 Molecular Devices). DHR relative fluorescence units (RFU) was expressed as a ratio of the Hoescht 33342 RFU in the same  
215 tissue. 1EM15 cells were cultured in a 60 mm culture dishes (Corning, NY) and treated with either 500  $\mu$ M BSO, 25  $\mu$ M  
216 H<sub>2</sub>O<sub>2</sub> or 500  $\mu$ M BSO + 10 mM NAC (for the periods described above). Lens epithelial explants were cultured in normal  
217 culture media or media containing 10 mM NAC for 24 or 48 hours, respectively. At the end of the treatment period, the  
218 culture medium was aspirated and replaced by 3 mL of ice-cold Medium 199. Dihydrorhodamine 123 (7.5  $\mu$ M) and 5 drops  
219 of NucBlue Live Ready Probe (Hoescht 33342, Thermo Fischer Scientific, MA) were added to each dish and allowed to  
220 incubate for 30 minutes at 4°C. Stained cells/explants were then washed three times in 4°C Medium 199 and finally 3mL  
221 of fresh 4°C Medium 199 was added to each dish. The cells or explants were then either imaged on a AxioVert.A1  
222 microscope (Zeiss) with an AxioCam 305 camera (Zeiss) and using a Photoflor LM 75 light source (89 North, VT).

### 224 **Western Blot Analysis**

21EM15 cells were cultured in 60 mm cell culture dishes (Corning, NY), treated with 500  $\mu$ M BSO or an equivalent volume of medium (control) for 48 hours, harvested by treatment with 0.05% trypsin for 3 min and the trypsin was neutralized with equal parts cell culture medium. The dissociated cells were transferred to a 1.5 mL microcentrifuge tube (Eppendorf, Hamburg, Germany) and subjected to centrifugation at 500 g for 3 min at room temperature. The cells were lysed by resuspension of the pellet in 250  $\mu$ L RIPA buffer (1% Nonidet P40, 0.5% sodium deoxycholate, 0.1% SDS in PBS), incubation for 10 mins on ice and passing the suspension 10 times each through 22, 25 and 28 gauge series of needles (in that order) [38]. The protein samples were then subjected to centrifugation at 14,000 rpm for 10 min at 4°C and the supernatant was collected. Protein concentrations in the supernatant were quantified using the Pierce BCA Protein Assay Kit (Thermo Fisher Scientific, MA) according to the manufacturer's instructions. Thirty  $\mu$ g of supernatant protein was resolved on a 4-20% SDS-PAGE gradient gel (Bio-Rad, CA) and transferred to a 0.2  $\mu$ m nitrocellulose blot (Bio-Rad, CA). Primary antibodies (1:1000) directed against NF- $\kappa$ B P65 (Cell Signaling Technologies, 8242T), P-NF- $\kappa$ B P65 (Cell Signaling Technologies, 3033T), IKK- $\beta$  (Cell Signaling Technologies, 8943S), I $\kappa$ B $\alpha$  (Cell Signaling Technologies, 4814T), P-I $\kappa$ B $\alpha$  (Cell Signaling Technologies, 2859T) or GAPDH (Abcam, ab9485) were used for immunoblotting. Horse radish peroxidase-conjugated goat anti-rabbit or goat anti-mouse secondary antibodies (1:5000, Cell Signaling Technologies, 7074P2) were used to visualize immunolabeled proteins. Quantitation of band densities was performed using NIH Image J software [31]. Target protein expression was normalized to the corresponding GAPDH expression or unphosphorylated protein, as appropriate. Data are presented as the mean density (and associated standard deviation) of the normalized protein.

## Statistical Analysis

Differences between gene expression and protein expression were determined using Student's unpaired t-test or one-way ANOVA with *post-hoc* Dunnett's test correction. Differences between cell counts were determined using one-way ANOVA with *post-hoc* Dunnett's test correction. Differences in ROS are expressed as fold change (of CON) and significance was determined using a one-way ANOVA with *post-hoc* Dunnett's test correction. All statistical analyses were conducted using GraphPad Prism version 9.1.1 for PC, GraphPad Software, La Jolla California, USA.  $P < 0.05$  was considered significant.

## Results

### ***Gclc* deletion induces an inflammatory response in the lenses of neonatal KO mice**

We have previously described the *Gclc*<sup>ff</sup>;*Le-Cre*<sup>Tg</sup> knockout (KO) mouse model used in this study [21]. Briefly, *Gclc* gene was specifically deleted from surface ectoderm-derived tissues (i.e., corneal epithelium, conjunctiva, eyelid, lens) from as early as embryonic day (E) 9 by crossing *Gclc*<sup>ff</sup> mice [22] with *Le-Cre* transgene mice [23]. KO mice have an overt microphthalmia phenotype that is characterized by vacuolation of the lens fiber cells at birth, hypercellularity of the retina, cornea and iris by P20, and severe retinal infolding by P50 (Supp. Fig. 1). Controlling for the *Le-Cre* transgene [39], revealed



257 that the microphthalmia phenotype and morphological changes in the KO mice are distinct from those in *Le-Cre* transgene  
258 hemizygous mice, termed CRE (Supp. Fig. 3).

259  
260 We have previously described the impaired lens development phenotype of KO mice by conducting RNA-seq analysis on  
261 lens tissue from KO and CON mice aged P1 [21]. Fifty-three genes associated with the Gene Ontology (GO) term “immune  
262 system process” were upregulated in the lenses of KO mice relative to those in CON mice (Fig. 1A, red dots). Complete  
263 analysis of the GO terms overrepresented among the up-regulated genes in the lenses of KO mice revealed many terms  
264 associated with the immune system/inflammation (e.g., “immune system process”, “inflammatory response”, “neutrophil  
265 chemotaxis”, “chemotaxis”, “cell adhesion”, “chemokine-mediated signaling pathway”, “positive regulation of  
266 inflammatory response”, “immune response”) (Fig. 1B). As a sensitivity analysis, the upregulated genes in KO mice were  
267 also analyzed with Ingenuity Pathway Analysis; several canonical pathways associated with the immune  
268 system/inflammation were overrepresented among the upregulated genes in KO mice (i.e., “agranulocyte adhesion and  
269 diapedesis”, “granulocyte adhesion and diapedesis”, “hepatic fibrosis/hepatic stellate cell activation”, “dendritic cell  
270 maturation”, “atherosclerosis signaling”, “phagosome formation”, “neuroinflammation signaling pathway”, “TREM1  
271 signaling”, “IL-10 signaling”) (Fig. 1C). Mapping the upregulated transcripts onto the Kyoto Encyclopedia of Genes and  
272 Genomes (KEGG) Cytokine-Cytokine Receptor Interaction pathway revealed 42 of the genes involved in this pathway were  
273 upregulated (Fig. 1D, highlighted in red) in the lenses of KO mice belonged to the CC subfamily, CXC subfamily,  $\gamma$ -chain  
274 utilizing, IL4-like, IL6/12-like, IL10/28-like, Interferon family, IL1-like cytokines, TNF family, and TGF- $\beta$  family. Of the 45  
275 differentially expressed genes (DEGs) in the lenses of KO mice (aged P1) that mapped to the Cytokine-Cytokine Receptor  
276 Interaction pathway, only three genes (*Ccl27*, *Cnfr*, *4-1Bbl*) were downregulated (Fig. 1D, highlighted in blue).  
277 Furthermore, many cytokines were among the top 25 upregulated genes in the lenses of KO mice (i.e., *Ccl7*, *Ccl4*, *Gdf15*,  
278 *Cxcl16*) (Supp. Table. 2).

### 280 **Innate immune cells infiltrate ocular structures of KO mice**

281 Morphological analysis of the eyes from KO mice showed an increased presence of cells in the aqueous and vitreous  
282 humors at P1 compared with age-matched CON mice (Supp. Figs. 1B, 1H; Supp. Fig. 2). Immunohistochemical staining  
283 revealed that the vitreous humor of KO and CON mice at P1 had cells of leukocytic origin present, as indicated by both  
284 CD45- (Fig. 2A-C, J-L, open arrows) and CD11b- (Fig. 2D-F, M-O, arrowheads) staining cells; some CD45-positive cells  
285 appeared to cross the lens capsule in the eyes of KO mice (Fig. 2L, open arrows). Immunohistochemical staining for CD68  
286 indicated the presence of macrophages in the vitreous humor of both KO and CON mice at P1 (Fig. 2G-I, P-S, closed arrows),  
287 which was expected given the role of macrophages in regression of the hyaloid vasculature [3, 4]. As anticipated, the  
288 lenses from CRE mice aged P1 also had a similar number of cells in the vitreous humor as age-matched CON mice (Supp.  
289 Fig. 2). Immunohistochemical staining revealed that some of the cells found in the vitreous humor of CRE mice by H&E  
290 staining (Supp. Fig. 3A (B')) were CD45- (Supp. Fig. 3B (A', B', arrowheads) or CD68- staining (Supp. Fig. 3B (F', closed  
291 arrows)).

292 Histological analysis of the eyes from CON mice aged P20 revealed that the aqueous and vitreous humors were almost  
293 entirely devoid of cells (Supp. Figs. 1C, 1D; Supp. Fig. 2). In contrast, histological analysis of the eyes from KO mice aged  
294 P20 revealed an increase in the number of cells in the aqueous and vitreous humor (Supp. Figs. 1I, 1J; Supp. Fig. 2). Eyes  
295 from KO mice aged P20 had CD45- (Fig. 3A-C, open arrows) and CD11b- (Fig. 3D-F, arrowheads) staining cells of leukocytic  
296 origin and CD68 staining macrophages present in the vitreous humor (Fig. 3G-I, closed arrows). As previously noted [6],  
297 lens malformation can induce immune surveillance of many ocular structures, a phenomena that was observed in the eyes  
298 of KO mice (Fig. 3). In the eyes of KO mice at P20, CD11b-staining cells were present in the retina, aqueous humor and  
299 corneal epithelium (Fig. 3E, F, arrow heads); CD45-staining cells appeared to be exiting the retina into the vitreous humor  
300 (Fig. 3C, open arrows); CD68-staining cells were found in the aqueous humor in the KO mice that had formed an aqueous  
301 humor (Fig. 3H, closed arrows). Histological analysis of CRE mice aged P20 revealed the presence of an elevated number  
302 of cells in the vitreous humor compared with CON mice (Supp. Fig. 2; Supp. Fig. 3A (C', D')); KO mice aged P20 had an  
303 elevated number of cells in the vitreous humor compared with CRE mice (Supp. Fig. 2; Supp. Fig. 3A (C', D')).  
304 Immunohistochemical analysis of these eyes revealed CD45-staining cells in the corneal endothelium (Supp. Fig. 3B (D',  
305 closed arrow)) and CD68 staining cells in the vitreous humor (Supp. Fig. 3B (G', H', open arrow)). As expected, the eyes  
306 from CON and CRE mice aged P50 were almost completely devoid of cells in the aqueous and vitreous humors (Supp. Fig.  
307 1E, F, closed arrows; Supp. Fig. 2; Supp. Fig. 3A (E', F')), whereas the eyes from KO mice aged P50 had a greater number  
308 of cells in the aqueous and vitreous humors compared with the eyes of CON mice (Supp. Fig. 1K, M; Supp. Fig. 2).

### 310 ***Gclc* deletion induces expression of immune system related genes and causes oxidative stress in the lenses of KO mice**

311 Given the alterations in immune surveillance in the eyes of KO mice, the expression of cytokine genes in the lenses of  
312 CON, KO and CRE mice aged P20 were evaluated (Fig. 4A). Since the expression of some cytokine genes in the lenses of  
313 CON mice were undetectable by RT-qPCR, the gene expression is displayed as  $\Delta Ct$ , such that a lower  $\Delta Ct$  corresponds to a  
314 greater gene expression. For genes with detectable expression levels in the lenses of CON mice (*Ccl7*, *Ccl2*, *Gdf15*), only  
315 the lenses of KO mice had an increase in gene expression (compared with CON mice) (Fig. 4A). The expression of *Ptprc* and  
316 *Cxcl16* were both upregulated in the lenses of KO mice compared with CRE mice (Fig. 4A). Levels of ROS were elevated in  
317 the lenses of P20-aged KO mice relative to similarly aged CON and CRE mice (Fig. 4B).

### 319 **Oxidative stress upregulates cytokine expression in lens epithelial cells**

320 To further evaluate the influence of oxidative stress on cytokine expression in the lens, 21EM15 mouse lens epithelial cells  
321 were depleted of GSH by treatment with buthionine sulfoximine (BSO), a chemical inhibitor of GSH biosynthesis. This  
322 intervention induced an oxidative stress response as indicated by the upregulation of the antioxidant response element  
323 (ARE) genes [40], *Gclc* and *Hmox1* (Fig. 5A), and a marked increase in ROS formation (Fig. 5D). Since 21EM15 cells do not  
324 express all of the cytokines that were differentially expressed in the lenses of KO mice [41] (Fig. 1), the effect of BSO-  
325 induced oxidative stress on the expression of cytokines could only be evaluated for a limited number of cytokines. BSO-

326 induced oxidative stress upregulated the expression of *Cxcl1*, *Cxcl12*, *Gdf15*, *Ccl7*, *Ccl2*, and *Csf1* (Fig. 5A). Similarly,  
327 treatment of 21EM15 cells with 25  $\mu$ M hydrogen peroxide ( $H_2O_2$ ) for 24 hours induced an oxidative stress response that  
328 involved upregulated expression of *Gclc* and *Hmox1* (Fig. 5B) and increased ROS formation (Fig. 5D). The  $H_2O_2$  treatment  
329 upregulated the expression of the cytokines *Ccl2*, *Ccl7*, and *Cxcl1* but failed to induce expression of the cytokines *Cxcl12*,  
330 *Csf1* or *Gdf15* (Fig. 5B). Co-treatment of 21EM15 cells for 48 hours with BSO and the antioxidant *N*-acetyl-L-cysteine (NAC)  
331 prevented the induction of oxidative stress by BSO as indicated by no induction of the expression of *Gclc* and *Hmox1* and  
332 no increase in ROS formation (Figs. 5C & D). The NAC co-treatment also prevented induction of the cytokines *Ccl7*, *Cxcl12*,  
333 *Gdf15*, *Ccl2*, *Csf1*, and *Cxcl1* (Fig. 5C). Collectively, these results suggest that oxidative stress is capable of inducing cytokine  
334 expression in lens epithelial cells.

335 Given that oxidative stress in lens epithelial cells can activate NF- $\kappa$ B [11, 42-44], an inducer of cytokine gene expression  
336 [45], the activation of NF- $\kappa$ B in cultured lens epithelial cells and *in vivo* lens was evaluated (Supp. Fig. 4). NF- $\kappa$ B activation  
337 can be mediated through several mechanisms: i) phosphorylation of NF- $\kappa$ B (P65 subunit), ii) proteasomal degradation  
338 of NF- $\kappa$ B, iii) proteasomal degradation of IKK- $\beta$  and/or iv) phosphorylation of I $\kappa$ B $\alpha$  [45]. The effect of BSO-induced oxidative  
339 stress (in 21EM15 cells) on these mechanisms for NF- $\kappa$ B activation were evaluated by Western blot (Supp. Figs. 4A & B).  
340 BSO treatment failed to influence NF- $\kappa$ B activation (Supp. Figs. 4A & B). Expression of genes induced by activated NF- $\kappa$ B  
341 in lens cells [46] (i.e., *Birc5*, *Bcl2*, *Bcl2l1*, *Birc2*) were also unchanged in cells treated with BSO (Supp. Fig. 4C). NF- $\kappa$ B-  
342 activated genes were similarly not induced in the lenses of KO mice aged P1 (Supp. Fig 4D).

### 344 **Epithelial-mesenchymal transition is associated with the increased cytokine expression**

345 Oxidative stress and, in particular, low GSH-induced oxidative stress transforms lens epithelial cells to myofibroblasts [17].  
346 This transformation is a feature of epithelial-mesenchymal transition (EMT) [18-20], a process characterized by increased  
347 expression of alpha-smooth muscle actin ( $\alpha$ -SMA) [19]. Therefore, we investigated if the increases in cytokine gene  
348 expression were associated with an EMT phenotype (Fig. 6).  $\alpha$ -SMA positive cells were found throughout the lens  
349 epithelium from the anterior pole to the posterior pole in the lenses of KO mice aged P1 (Fig. 6A (B', C', closed arrow)).  
350 Analysis of  $\alpha$ -SMA expression in the lenses of KO mice aged P20 similarly revealed  $\alpha$ -SMA positive cells throughout the  
351 lens epithelium (Fig. 6A (E', F', closed arrow)). Intriguingly, the lens epithelium of CRE mice also possessed  $\alpha$ -SMA staining  
352 cells, although this phenotype was not present in the lenses of all CRE mice (in contrast to KO mice where it was present  
353 in all eyes analyzed)) (Supp. Figs. 5 A, B & F, arrow).

### 355 **Mitigation of oxidative stress in lens epithelial explants prevents induction of cytokine expression**

356 Given the links between oxidative stress, cytokine expression and EMT [9, 17, 47-50], we wished to explore if antioxidant  
357 administration could prevent the induction of cytokines and an EMT phenotype in a lens cataract surgery model, viz. the  
358 lens epithelial explant model. This model is a powerful tool for understanding lens epithelial cell biology and pathology,  
359 including posterior capsule opacification (PCO), a common complication of cataract surgery [35]. A recent RNA-seq

360 experiment found that lens epithelial explants upregulate the expression of cytokines, antioxidant response element  
361 genes and markers of EMT within 24 hours of being established (personal communication with Dr. Michael Robinson,  
362 [51]). Thus, we investigated the role of oxidative stress in these processes. Treatment of lens epithelial explants with 10  
363 mM NAC reduced oxidative stress as evidenced by reduced expression of *Gclc* and *Hmox1* (Fig. 6B) and reduced the  
364 presence of ROS (Fig. 6C). The treatment of lens epithelial explants with 10 mM NAC only had a non-significant effect on  
365 preventing EMT, as evidenced by the trend towards increased expression of the lens identity genes, *Cdh1* and *Maf*, and  
366 decreased expression of known markers of EMT, *Acta2* (Supp. Fig. 6). The NAC treatment also prevented the induction of  
367 *Csf1* and *Gdf15* (Fig. 6E), but did not prevent the induction of *Ccl2*, *Ccl7*, or *Cxcl1* (Supp. Fig. 7).

## 369 Discussion

370 Mounting evidence challenges the long-held notion that the lens is isolated from the immune system [6-9], which may  
371 have important implications for ocular health. The mechanism(s) by which immune surveillance of the lens and other  
372 ocular structures can be triggered by damage to the lens remains to be understood. The upregulation of cytokine  
373 expression in human lens epithelial (HLE-B3, SRA01/04) cells by H<sub>2</sub>O<sub>2</sub> [32] and ultraviolet B radiation [52] suggests that  
374 oxidative stress may elicit an inflammatory response in the lens. To our knowledge, a detailed characterization of oxidative  
375 stress-induced lens inflammation has yet to be performed *in vitro* or *in vivo*. In the present study, we have extended our  
376 previous unexpected finding that deletion of *Gclc* from the developing lens (and resulting oxidative stress) upregulates  
377 the expression of 42 cytokines and promotes immune surveillance of the cornea, aqueous humor and vitreous humor [21].  
378 In addition, we also report that oxidative stress can induce cytokine expression in cultured lens epithelial cells (*Ccl2*, *Ccl7*,  
379 *Csf1*, *Cxcl1*, *Cxcl12*, *Gdf15*) and lens epithelial explants (*Csf1*, *Gdf15*). Lastly, our data suggest that the upregulation of  
380 cytokines is associated with EMT.

381 We found that oxidative stress upregulated the expression of 42 cytokines in the neonatal lenses of *Gclc* KO mice and that  
382 immune cells were present in the cornea, retina, aqueous humor and vitreous humor of these mice. Cytokines are small  
383 secreted proteins that modulate cell growth and differentiation, and activation and migration of immune cells to areas of  
384 tissue damage. Chemokines are a class of cytokine secreted from cells that recruit immune cells to a site of tissue damage  
385 [53]. Interestingly, amongst the upregulated genes in the lenses of KO mice were potent chemokines for many leukocytes,  
386 e.g., *Ccl6* [54], *Ccl4* [55], *Ccl7* [56], *Ccl2* [57], *Cxcl12* [58]. It is reasonable to expect that increased secretion of these  
387 cytokines contributed to the observed recruitment of the immune cells to the eyes of KO mice (as detected by  
388 immunohistochemical staining for CD45, CD11b and CD68). The induction of these chemokines in lens epithelial cells  
389 (21EM15) by oxidative stress strongly suggests that the increased expression of these genes *in vivo* is largely due to  
390 increased expression in lens epithelial cells rather than from infiltrating immune cells. This contention is supported by the  
391 finding that many of the genes encoding these chemokines are poised for expression (in a state of “open” chromatin) [59],  
392 expressed in lens epithelial cells *in vitro* [41] and *in vivo* [60, 61], and rapidly upregulated in mouse lens epithelial cells  
393 following mock cataract surgery [7]. Collectively, these data are consistent with oxidative stress upregulating cytokine

394 expression in lens epithelial cells, leading to enhanced immune surveillance of ocular structures. Thus, mitigation of  
395 oxidative stress and/or cytokine expression in lens epithelial cells may dampen immune surveillance of ocular structures.

396 There are many mechanisms by which oxidative stress can induce cytokine expression in cells, one of which is activation  
397 of NF- $\kappa$ B [11, 42-44]. The results derived from lens epithelial (21EM15) cells and lenses from KO mice do not support a  
398 mechanistic role of NF- $\kappa$ B activation in our experimental settings. Other mechanisms by which oxidative stress can induce  
399 cytokine expression include altered histone code [62-66], damaged mitochondrial DNA [67, 68], upregulated IRF1  
400 expression [69] and activated AP-1 [66, 70], STAT3 [71], NLRP3 [72, 73] and MAPK [32] signaling pathways. Which of these  
401 mechanisms mediates the effects in the KO lens remains to be established.

402 Inflammation manifesting in ocular structures after cataract surgery is thought to result from disruption of the blood-  
403 aqueous barrier that is formed by the iris and ciliary, prostaglandin release from the iris and ciliary body, or lens-induced  
404 uveitis [74-76]. Our results raise the possibility that oxidative stress-induced inflammation of lens epithelial cells may  
405 contribute to the inflammation after cataract surgery. This proposal is supported by the finding that, in humans, markers  
406 of oxidative stress (i.e., malondialdehyde) and cytokines are elevated in the aqueous humor after cataract surgery [74].  
407 Given that: i) some researchers consider a common complication of cataract surgery, posterior capsule opacification  
408 (PCO), to be a form of postoperative inflammation [77], ii) myofibroblasts produce cytokines [78], iii) chemokine gene  
409 expression is higher in fibroblasts than in epithelium [79] and iv) lens epithelial cells undergoing EMT express chemokines  
410 [80], we hypothesize that the increased expression of cytokine genes induced by oxidative stress may be related to EMT  
411 of lens epithelial cells. This hypothesis is supported by our *ex vivo* experiments in which the treatment of lens epithelial  
412 cell explants with the antioxidant NAC reduced oxidative stress, attenuated the development of EMT markers, and  
413 prevented the induction of the chemokines *Csf1* and *Gdf15*. It has been reported that ultraviolet B radiation can induce  
414 the expression of *Gdf15* in lens epithelial cells [52] and *Gdf15* expression promotes EMT in colorectal cancers [47]. Our  
415 findings that *Gdf15* was among the 25 most upregulated genes in the lenses of KO mice and was associated with the  
416 development of markers of EMT led us to speculate that oxidative stress-induced expression of *Gdf15* may be involved in  
417 EMT of lens epithelial cells during PCO. However, our current data cannot eliminate the possibility that the induction of  
418 *Csf1* may also be involved in the pathogenesis of PCO and/or fibrosis of the lens, as suggested by a report that found a  
419 role for CSF1 in macrophage-induced fibrosis of the lens [81]. Future studies will be needed to discern these possibilities.

420 A hallmark of EMT in the lens has been the presence of  $\alpha$ -SMA positive cells, which arise from the lens epithelial cells [82].  
421 However, recent work has demonstrated that  $\alpha$ -SMA expressing cells in the lens can arise from multiple sources including:  
422 i) populations of G8 positive mesenchymal precursor cells that reside within the lens epithelium [83], ii) resident lens  
423 immune cells [9, 50], and iii) infiltrating immune cells [6] (including macrophages [81]). Given the extensive damage to the  
424 lens in KO mice and recruitment of immune cells to the lens, it is likely that the source of  $\alpha$ -SMA positive cells is not  
425 homogenous and may involve some (or all) of the described cellular sources.

426 Taking into account our data and numerous previous reports [9, 17, 47-50], we postulate that a positive feedback loop  
427 exists wherein increases in oxidative stress and cytokine gene expression are connected in a manner that ultimately results  
428 in PCO (Fig. 7). Such a positive feedback loop may have important implications for postoperative cataract surgery care.

429 Inflammation following cataract surgery is typically controlled by the combined administration of corticosteroids and non-  
430 steroidal anti-inflammatory drugs [76]. While this treatment strategy is effective at dampening the inflammation, its ability  
431 to prevent PCO is equivocal [84-89]. The failure of this treatment strategy to prevent PCO may be due to its inability to  
432 mitigate oxidative stress [90-93], which is essential for preventing the development of PCO-relevant physiological and  
433 molecular events [17, 32, 49, 94]. It is hoped that the results of the present study will motivate the exploration of  
434 treatment strategies that include antioxidant agents as a means to further reduce postoperative inflammation and prevent  
435 PCO formation. Should such a strategy be effective, it may reduce the immense burden of PCO which can affect upwards  
436 of 25% of adults [95] who undergo cataract surgery.

#### 437

#### 438 **Acknowledgements**

439 We would like to thank Mr. Rolando Garcia-Milan for his advice on the RNA-seq analysis, the laboratory of Dr. Mark  
440 Petrash for their assistance with the histology and the members of the laboratory of Dr. Michael Robinson for their  
441 thoughtful discussions.

#### 442

#### 443 **Author Contributions**

444 V.V. conceived of the study. B.T., Y.C., and V.V. designed the experiments. B.T. performed the experiments. B.T., E.A.D.,  
445 Y.C., D.J.O., D.C.T. and V.V. analyzed data, discussed results, wrote and edited the manuscript.

#### 446

#### 447 **Funding**

448 This work was supported, in part, by the National Institutes of Health Grants EY017963, EY022313 and K01AA025093. This  
449 work was also made possible by CTSA Grant Number TL1 TR001864 from the National Center for Advancing Translational  
450 Science (NCATS), components of the National Institutes of Health (NIH), and NIH roadmap for Medical Research. The  
451 contents of this manuscript are solely the responsibility of the authors and do not necessarily represent the official view  
452 of NIH.

#### 453

#### 454 **Competing Interests**

455 The authors declare that they have no competing or financial interests.

#### 456

#### 457 **Figures Legends**

458 **Figure 1. Inflammatory response in the lenses of KO mice at postnatal day 1.** RNA-sequencing of postnatal day (P) 1  
459 lenses revealed changes in genes in KO mice relative to CO mice. (A) Volcano plot illustrating the 530 downregulated

460 (P<0.05) and 1022 upregulated (P<0.05) genes in KO mice (pooled samples from 3 mice). The 53 upregulated DEGs that  
461 represent the biological processes GO term “immune system process” (red arrow) are indicated by red dots. The  
462 probability (-log<sub>10</sub>(adjusted P)) (Y-axis) is Benjamini-Hochberg-corrected. Fold changes (KO vs. CON) are displayed on the  
463 X-axis as log<sub>2</sub>FC. **B**) Top biological processes (BP) gene ontology (GO) terms among upregulated genes. The -log<sub>10</sub>(P-Value)  
464 for each term is indicated by a blue bar. The number of DEGs among each term is indicated at the righthand end of each  
465 bar. P-values are Benjamini-Hochberg adjusted. **(C)** Top canonical pathways among upregulated genes as identified with  
466 Ingenuity Pathway Analysis. The -log<sub>10</sub>(P-Value) for each canonical pathway is indicated by a blue bar. P-values are  
467 Benjamini-Hochberg adjusted. **(D)** The Kyoto Encyclopedia of Genes and Genomes (KEGG) Mapper Cytokine-Cytokine  
468 Receptor Interaction map annotated to highlight DEGs. Colors: blue shading, downregulated; red shading, upregulated.  
469 Darker shading colors indicate greater differential expression.

470

471 **Figure 2: Immunohistochemical analysis of immune cells in the eyes of KO and CON mice aged postnatal day 1.** Eyes  
472 from CON **(A-I)** and KO **(J-S)** mice aged postnatal day (P) 1 were subjected to immunohistochemical staining and  
473 counterstained with hematoxylin. CD45 **(A-C, J-L, open arrows)** and CD11b **(D-F, M-O, arrowheads)** staining marks non-  
474 macrophage leukocytes. CD68 staining **(G-I, P-S, arrows)** marks macrophages. Regions in squares in panels D, E, H, K, N  
475 and R are shown at higher magnification in **C, F, I, L, O** and **S**, respectively. Abbreviations: C, cornea; L, lens; R, retina; V,  
476 vitreous humor. Magnification is indicated in the lower right corner of each image.

477

478 **Figure 3: Immunohistochemical analysis of immune cells in the eyes of KO mice aged postnatal day 21.** Eyes from KO  
479 mice aged postnatal day (P) 20 were subjected to immunohistochemical staining and counterstained with hematoxylin.  
480 CD45- **(A-C, open arrows)** and CD11b staining **(D-F, arrowheads)** marks non-macrophage leukocytes. CD68-staining **(G-I,**  
481 **arrows)** marks macrophages. Abbreviations: A, aqueous humor C, cornea; L, lens; R, retina; V, vitreous humor.  
482 Magnification is indicated in the lower right corner of each image.

483

484 **Figure 4: Cytokine gene expression and ROS levels in the lenses of CON, KO and CRE mice aged postnatal day 20.** **(A)**  
485 Lenses from CON, CRE and KO mice aged postnatal (P) 20 were analyzed for induction of genes involved in the  
486 inflammatory response by reverse transcriptase (RT) quantitative PCR (qPCR), as calculated by the  $\Delta$ Ct method. GAPDH  
487 was used as an internal normalization control. Gene expression ( $\Delta$ Ct) is presented as the mean and associated standard  
488 deviation from 3 mice. \* P < 0.05, one-way ANOVA with *post-hoc* Dunnett’s test, compared to group indicated by  
489 horizontal bar. *n.d.* = not detectable **(B)** ROS production in the lenses of CON, KO and CRE mice aged P20. ROS levels were  
490 monitored using the ROS probe dihydrorhodamine 123 (DHR) and cell nuclei were labelled with Hoescht 33342. DHR  
491 relative fluorescence units (RFU) was expressed as a ratio of the Hoescht 33342 RFU in the same tissue. Data are presented  
492 as fold change (FC) relative to CON with associated standard deviation. \* P < 0.05, one-way ANOVA t-test with *post-hoc*  
493 Dunnett’s test, compared to genotype indicated.

494

495 **Figure 5. Oxidative stress induces cytokine expression in lens epithelial cells.** Lens epithelial cells (21EM15) were treated  
496 with (A) 500  $\mu$ M buthionine sulfoximine (BSO) for 48 hours, (B) 25  $\mu$ M H<sub>2</sub>O<sub>2</sub> for 24 hours, or (C) 500  $\mu$ M BSO and 10 mM  
497 *N*-acetyl-L-cysteine (NAC) for 48 hours. Gene expression was determined by reverse transcriptase (RT) quantitative PCR  
498 (qPCR), as calculated by the  $\Delta$ Ct method. GAPDH was used as an internal normalization control. Gene expression is  
499 displayed as the average of the fold change relative to control and associated standard deviation from three independent  
500 experiments. \*  $P < 0.05$  Student's unpaired t-test, compared to untreated (0  $\mu$ M) cells. (D) ROS production was determined  
501 in 21EM15 cells treated with 500  $\mu$ M BSO for 48 hours, 25  $\mu$ M H<sub>2</sub>O<sub>2</sub> for 24 hours, or 500  $\mu$ M BSO + 10 mM NAC for 48  
502 hours using the ROS probe dihydrorhodamine 123 (DHR). Cell nuclei were labelled with Hoescht 33342. Images were taken  
503 with the same camera settings and magnification (200x).

504

505 **Figure 6: Analysis of markers of EMT in KO lenses aged P20 and detection of markers of oxidative stress, and cytokine**  
506 **expression in lens epithelial explants.** (A) Immunohistochemical staining for alpha-smooth muscle actin ( $\alpha$ -SMA) and  
507 counterstaining with hematoxylin in the eyes of KO mice aged postnatal day (P) 1 and 20. Positive staining for  $\alpha$ -SMA  
508 (closed arrows) indicates cells undergoing EMT. Regions demarcated by boxes in B' and E' are shown in higher  
509 magnification in C' and F', respectively. Dashed box in F' shown at 400X magnification in inset. Magnification is indicated  
510 in the lower right corner of each image. (B-E) Lens epithelial explant systems were established in normal media (0mM  
511 NAC) or media containing 10 mM *N*-acetyl-L-cysteine (10mM NAC) and cultured for 24 hours. (B) Expression of antioxidant  
512 response element genes. (C) ROS levels were monitored by dihydrorhodamine 123 (DHR) staining. Cell nuclei were labelled  
513 with Hoescht 33342. Images were taken with the same camera settings and magnification (200x). NAC- = 0mM NAC. (D)  
514 Expression of cytokines. Gene expression was determined by reverse transcriptase (RT) quantitative PCR (qPCR), as  
515 calculated by the  $\Delta$ Ct method. GAPDH was used as an internal normalization control. Gene expression is presented as the  
516 mean of the fold change relative to control (0  $\mu$ M NAC) and standard deviation. \*  $P < 0.05$ , Student's unpaired t-test,  
517 compared to 0mM NAC.

518

519 **Figure 7: Proposed positive feedback loop by which oxidative stress and cytokine expression promote Posterior Capsule**  
520 **Opacification (PCO).** We propose that a positive feedback loop reinforces the development of PCO. Increased ROS-driven  
521 oxidative stress and/or increased cytokine expression not only, induce the transdifferentiation of the remaining epithelial  
522 cells into myofibroblasts (EMT) but, increase each other and together reinforce EMT. Consequently, as more of the  
523 remaining lens epithelial cells undergo EMT occurs, PCO develops. Created with bioender.com.

524

525 **Supplemental Figures:**

526



**Supplemental Figure 1: Histological analysis of eyes from CON and KO mice.** Tissue sections of eyes from CON and KO mice aged postnatal day (P) 1, 20 and 50 were analyzed for changes in gross morphology. Hematoxylin & eosin staining of eyes from CON (A-F) and KO (G-M) mice. Abbreviations: C, cornea; L, lens; R, retina; V, vitreous humor. Regions demarcated by boxes in A, C and E are shown in higher magnification in B, D and F, respectively. Magnification is indicated in the lower right corner of each image.

**Supplemental Figure 2: Cell counts in the Aqueous and Vitreous Humors.** The eyes from CON, CRE and KO mice aged P1, P20 or P50 (n=3) were sectioned, stained by H&E and the number of cells in aqueous and vitreous humor counted. Data are presented as the mean  $\pm$  SD from 3 mice (the number of cells in the pair of eyes from each mouse were averaged). \* P < 0.05, ANOVA with *post-hoc* Tukey's test correction, compared with CON; †, P < 0.05, ANOVA with *post-hoc* Tukey's test correction, compared with CRE

**Supplemental Figure 3: Characterization of immune surveillance of ocular structures in the eyes of CRE mice.** The eyes from CRE mice aged postnatal day (P) 1, 21 and 50 were analyzed for the presence of cells in ocular structures. (A) Hematoxylin & eosin (H&E) staining at P1 (A', B'), P21 (C', D') and P50. (E' F'). (B) Immunohistochemical staining against CD45 in P1 (A', B') and P21 (C', D') CRE mice. Closed arrows indicate leukocytes. Immunohistochemical staining against CD68 in P1 (E', F') and P21 (G', H') CRE mice. Open arrows indicate macrophages. Regions demarcated by boxes in A', E' and G' are shown in higher magnification in B', F' and H', respectively. Abbreviations: C, cornea; L, lens; R, retina; V, vitreous humor. Magnification is indicated in the lower right corner of each image.

**Supplemental Figure 4: NF- $\kappa$ B activation in lens epithelial cells and lenses.** 21EM15 cells were treated for 48 hours with 500  $\mu$ M BSO and analyzed for NF- $\kappa$ B activation by quantifying the expression and activation (phosphorylation, P) of members of the NF- $\kappa$ B signaling pathway. (A) Representative Western blot of control (0  $\mu$ M BSO) and treated (500  $\mu$ M BSO) cells. (B) NF- $\kappa$ B signaling pathway protein (Ikk- $\beta$ , NF- $\kappa$  $\beta$ , I $\kappa$ B $\alpha$ ) and phosphorylated protein (P-I $\kappa$ B $\alpha$ ) expression in control and BSO-treated cells were normalized to Ponceau S stain. Data are presented as the mean and associated standard deviation from three independent experiments. No differences occurred between BSO-treated and control cells (Student's unpaired t-test, with P < 0.05 being considered significant). (C) Expression of genetic targets of NF- $\kappa$ B in control (0  $\mu$ M BSO) and treated (500  $\mu$ M BSO) 21EM15 cells. Gene expression was determined by reverse transcriptase (RT) quantitative PCR (qPCR) with the  $\Delta$ Ct method and GAPDH used as an internal normalization control. Gene expression is presented as the mean fold-change relative to control with associated standard deviation from three independent experiments. No differences occurred between BSO-treated and control cells (Student's unpaired t-test, with P < 0.05 being considered significant). (D) RNA-seq box plots indicating variance stabilizing transformed (VST) normalized count data for genetic targets of NF- $\kappa$ B in the lenses of KO mice compared with the lenses of CON mice aged P1. VST count data are shown as mean (thin horizontal bar)  $\pm$  standard deviation (error bar). Significance was evaluated at P < 0.05 and determined by the Benjamini-Hochberg method.

562

563 **Supplemental Figure 5: Analysis of a marker of EMT in the lenses of CRE mice aged P1 and P21.** Immunohistochemical  
564 staining for  $\alpha$ -SMA (closed arrows) and counterstaining with hematoxylin in the eyes of CRE mice aged postnatal day (P)  
565 1 (A, B) and 21 (C-F). Regions demarcated by boxes in A, C and E are shown in higher magnification in B, D and F,  
566 respectively. Magnification is indicated in the lower right corner of each image.

567

568 **Supplemental Figure 6: Analysis of EMT-related genes in lens epithelial explants.** Lens epithelial explant systems were  
569 established in normal media or media containing 10 mM *N*-Acetyl-L-cysteine (NAC) and cultured for 24 hours. Gene  
570 expression was determined by reverse transcriptase (RT) quantitative PCR (qPCR), as calculated by the  $\Delta$ Ct method.  
571 GAPDH was used as an internal normalization control. Gene expression is displayed as the average of the fold change  
572 relative to control and associated standard deviation. \* P-value < 0.05 Student's unpaired t-test, compared to untreated  
573 (0 mM) explants.

574

575 **Supplemental Figure 7: Analysis of cytokine expression in lens epithelial explants.** Lens epithelial explant systems were  
576 established in normal media (0mM NAC) or media containing 10 mM *N*-Acetyl-L-cysteine (10mM NAC) and cultured for  
577 24 hours. Gene expression was determined by reverse transcriptase (RT) quantitative PCR (qPCR), as calculated by the  $\Delta$ Ct  
578 method. GAPDH was used as an internal normalization control. Gene expression is displayed as the average of the fold-  
579 change relative to control, with associated standard deviation. \* P < 0.05. Student's unpaired t-test, compared to  
580 untreated (0 mM) explants.

581

582 **Supplemental Table 1: Primers used for RT-qPCR**

| Gene          | Forward Primer        | Reverse Primer           |
|---------------|-----------------------|--------------------------|
| <i>Acta2</i>  | GTGAAGAGGAAGACAGCACAG | GCCCATCCAACCACTACTCC     |
| <i>Ccl2</i>   | GTCCCTGTCATGCTTCTGG   | GCTCTCCAGCCTACTCATTG     |
| <i>Ccl4</i>   | AAACCTAACCCGAGCAAC    | CGGGAGGTGTAAGAGAAACAG    |
| <i>Ccl7</i>   | TCTCTACTCTCTTCTCCACC  | GGGATCTTTGTTTCTTGACATAGC |
| <i>Csf1</i>   | TGATTGGGAATGGACACCTG  | CAGCTGTTCTGGTCTACAAA     |
| <i>Cxcl1</i>  | AGAACATCCAGAGCTTGAAGG | CAATTTTCTGAACCAAGGGAGC   |
| <i>Cxcl12</i> | ACTCCAAACTGTGCCCTTC   | AAGCTTTCTCCAGGTACTCTTG   |
| <i>Cxcl16</i> | GTTGCAGTCCAAAAGCGTG   | GTCTGGGTACTGGCTTGAG      |
| <i>Gapdh</i>  | TTGATGGCAACAATCTCCAC  | CGTCCCGTAACAAAATGGT      |
| <i>Gclc</i>   | GTCTCAAGAACATCGCCTCC  | CTGCACATCTACCACGCAGT     |
| <i>Gdf15</i>  | GAGAGGACTCGAACTCAGAAC | GACCCCAATCTCACCTCTG      |

|              |                      |                       |
|--------------|----------------------|-----------------------|
| <i>Hif1a</i> | TGCCACTTCCCCACAATG   | GTCCATCTGTGCCTTCATCTC |
| <i>Hmox1</i> | TCAAGGCCTCAGACAAATCC | ACAACCAGTGAGTGGAGCCCT |
| <i>Ptprc</i> | CCTTTGGATTTGCCCTTCTG | TCGTTGTGGTAGCTATGGTTG |

583

584

585 **Supplemental Table 2: Top 25 upregulated genes in the lenses of KO mice aged P1 compared with lenses from similarly**  
 586 **aged CON mice.**

| Gene Symbol   | log <sub>2</sub> FC <sup>a</sup> | adjusted P value <sup>b</sup> |
|---------------|----------------------------------|-------------------------------|
| Arg1          | 7.411177                         | 2.10E-56                      |
| Ptgs2         | 7.235448                         | 2.57E-38                      |
| 3300005D01Rik | 6.342014                         | 1.10E-25                      |
| Cdsn          | 6.030009                         | 7.87E-22                      |
| Slc14a1       | 6.014576                         | 2.95E-22                      |
| Ccl7          | 5.991658                         | 8.79E-83                      |
| Rbp4          | 5.704899                         | 3.70E-28                      |
| Cdkn1a        | 5.680406                         | 3.39E-57                      |
| Dglucy        | 5.623126                         | 1.75E-18                      |
| Arr3          | 5.587417                         | 7.37E-22                      |
| Ccl4          | 5.574396                         | 3.39E-18                      |
| Ccdc141       | 5.544726                         | 1.31E-19                      |
| Ch25h         | 5.454229                         | 3.18E-16                      |
| Gdf15         | 5.42999                          | 1.97E-26                      |
| Cd300ld       | 5.392139                         | 1.97E-16                      |
| Car2          | 5.338622                         | 1.52E-70                      |
| Cxcl16        | 5.274513                         | 1.15E-15                      |
| Clrn2         | 5.215495                         | 3.66E-18                      |
| Fgl2          | 5.134096                         | 1.78E-15                      |
| Tns4          | 5.082742                         | 3.80E-14                      |
| Adrb2         | 5.044112                         | 2.34E-40                      |
| Cd300lb       | 5.007534                         | 2.49E-13                      |
| S1pr2         | 4.960696                         | 2.49E-13                      |
| Slc37a2       | 4.801622                         | 4.07E-12                      |
| Dusp10        | 4.792521                         | 8.03E-13                      |

587 <sup>a</sup> log<sub>2</sub>FC = KO compared with CON

588 <sup>b</sup> adjusted P value = Benjamini-Hochberg method

589

590 **References**

- 591 1. Luty, G.A. and D.S. McLeod, *Development of the hyaloid, choroidal and retinal vasculatures in the fetal human*  
 592 *eye*. Progress in Retinal and Eye Research, 2018. **62**: p. 58-76.  
 593 2. Zhang, H., et al., *Novel Discovery of LYVE-1 Expression in the Hyaloid Vascular System*. Investigative Ophthalmology  
 594 & Visual Science, 2010. **51**(12): p. 6157-6161.

- 595 3. Lang, R.A. and J.M. Bishop, *Macrophages are required for cell death and tissue remodeling in the developing mouse*  
596 *eye*. *Cell*, 1993. **74**(3): p. 453-462.
- 597 4. Cuthbertson, R.A. and R.A. Lang, *Developmental ocular disease in GM-CSF transgenic mice is mediated by*  
598 *autostimulated macrophages*. *Developmental Biology*, 1989. **134**(1): p. 119-129.
- 599 5. Nishitani, K. and K. Sasaki, *Macrophage localization in the developing lens primordium of the mouse embryo – An*  
600 *immunohistochemical study*. *Experimental Eye Research*, 2006. **83**(1): p. 223-228.
- 601 6. Logan, C.M., C.J. Bowen, and A.S. Menko, *Induction of Immune Surveillance of the Dysmorphic Lens*. *Scientific*  
602 *Reports*, 2017. **7**(1): p. 16235.
- 603 7. Jiang, J., et al., *Lens Epithelial Cells Initiate an Inflammatory Response Following Cataract Surgery*. *Investigative*  
604 *Ophthalmology & Visual Science*, 2018. **59**(12): p. 4986-4997.
- 605 8. DeDreu, J., et al., *An immune response to the avascular lens following wounding of the cornea involves ciliary*  
606 *zonule fibrils*. *The FASEB Journal*, 2020. **34**(7): p. 9316-9336.
- 607 9. Menko, A.S., et al., *Resident immune cells of the avascular lens: Mediators of the injury and fibrotic response of*  
608 *the lens*. *The FASEB Journal*, 2021. **35**(4): p. e21341.
- 609 10. Sies, H., *Oxidative stress: a concept in redox biology and medicine*. *Redox Biology*, 2015. **4**: p. 180-183.
- 610 11. Morgan, M.J. and Z.-g. Liu, *Crosstalk of reactive oxygen species and NF- $\kappa$ B signaling*. *Cell Research*, 2011. **21**(1): p.  
611 103-115.
- 612 12. Lawrence, T., *The Nuclear Factor NF- $\kappa$ B Pathway in Inflammation*. *Cold Spring Harbor Perspectives in Biology*,  
613 2009. **1**(6).
- 614 13. Blaser, H., et al., *TNF and ROS Crosstalk in Inflammation*. *Trends in Cell Biology*, 2016. **26**(4): p. 249-261.
- 615 14. Wishart, T.F.L., et al., *Hallmarks of lens aging and cataractogenesis*. *Experimental Eye Research*, 2021. **210**: p.  
616 108709.
- 617 15. Lou, M.F., *Redox regulation in the lens*. *Progress in Retinal and Eye Research*, 2003. **22**(5): p. 657-682.
- 618 16. Robinson, J.M., *Reactive oxygen species in phagocytic leukocytes*. *Histochemistry and Cell Biology*, 2008. **130**(2):  
619 p. 281.
- 620 17. Wei, Z., et al., *Reduced Glutathione Level Promotes Epithelial-Mesenchymal Transition in Lens Epithelial Cells via*  
621 *a Wnt/ $\beta$ -Catenin–Mediated Pathway: Relevance for Cataract Therapy*. *The American Journal of Pathology*, 2017.  
622 **187**(11): p. 2399-2412.
- 623 18. Chamberlain, C.G., K.J. Mansfield, and A. Cerra, *Glutathione and catalase suppress TGF $\beta$ -induced cataract-*  
624 *related changes in cultured rat lenses and lens epithelial explants*. *Molecular vision*, 2009. **15**: p. 895-905.
- 625 19. Whitson, J.A., et al., *Transcriptome of the GSH-Depleted Lens Reveals Changes in Detoxification and EMT Signaling*  
626 *Genes, Transport Systems, and Lipid Homeostasis*. *Investigative Ophthalmology & Visual Science*, 2017. **58**(5): p.  
627 2666-2684.
- 628 20. Whitson, J.A., et al., *Proteomic analysis of the glutathione-deficient LEGSKO mouse lens reveals activation of EMT*  
629 *signaling, loss of lens specific markers, and changes in stress response proteins*. *Free Radical Biology and Medicine*,  
630 2017. **113**: p. 84-96.
- 631 21. Thompson, B., et al., *Impaired GSH biosynthesis disrupts eye development, lens morphogenesis and PAX6 function*.  
632 *The Ocular Surface*, 2021. **22**: p. 190-203.
- 633 22. Chen, Y., et al., *Hepatocyte-specific Gclc deletion leads to rapid onset of steatosis with mitochondrial injury and*  
634 *liver failure*. *Hepatology*, 2007. **45**(5): p. 1118-28.
- 635 23. Ashery-Padan, R., et al., *Pax6 activity in the lens primordium is required for lens formation and for correct*  
636 *placement of a single retina in the eye*. *Genes & Development*, 2000. **14**(21): p. 2701-2711.
- 637 24. Afgan, E., et al., *The Galaxy platform for accessible, reproducible and collaborative biomedical analyses: 2016*  
638 *update*. *Nucleic acids research*, 2016. **44**(W1): p. W3-W10.
- 639 25. Bolger, A.M., M. Lohse, and B. Usadel, *Trimmomatic: a flexible trimmer for Illumina sequence data*. *Bioinformatics*  
640 (Oxford, England), 2014. **30**(15): p. 2114-2120.
- 641 26. Kim, D., B. Langmead, and S.L. Salzberg, *HISAT: a fast spliced aligner with low memory requirements*. *Nature*  
642 *methods*, 2015. **12**(4): p. 357-360.
- 643 27. Liao, Y., G.K. Smyth, and W. Shi, *featureCounts: an efficient general purpose program for assigning sequence reads*  
644 *to genomic features*. *Bioinformatics*, 2014. **30**(7): p. 923-930.
- 645 28. Love, M.I., W. Huber, and S. Anders, *Moderated estimation of fold change and dispersion for RNA-seq data with*  
646 *DESeq2*. *Genome biology*, 2014. **15**(12): p. 550-550.
- 647 29. Benjamini, Y. and Y. Hochberg, *Controlling the False Discovery Rate: A Practical and Powerful Approach to Multiple*  
648 *Testing*. *Journal of the Royal Statistical Society: Series B (Methodological)*, 1995. **57**(1): p. 289-300.

- 649 30. Huang, D.W., B.T. Sherman, and R.A. Lempicki, *Systematic and integrative analysis of large gene lists using DAVID*  
650 *bioinformatics resources*. Nature Protocols, 2009. **4**(1): p. 44-57.
- 651 31. Girish, V. and A. Vijayalakshmi, *Affordable image analysis using NIH Image/ImageJ*. Indian J Cancer, 2004. **41**(1):  
652 p. 47.
- 653 32. Li, X., et al., *L-carnitine alleviates oxidative stress-related damage via MAPK signaling in human lens epithelial cells*  
654 *exposed to H<sub>2</sub>O<sub>2</sub>*. Int J Mol Med, 2019. **44**(4): p. 1515-1522.
- 655 33. Sun, Y., et al., *Glutathione depletion induces ferroptosis, autophagy, and premature cell senescence in retinal*  
656 *pigment epithelial cells*. Cell Death & Disease, 2018. **9**(7): p. 753.
- 657 34. Zelenka, P.S., C.Y. Gao, and S.S. Saravanamuthu, *Preparation and Culture of Rat Lens Epithelial Explants for*  
658 *Studying Terminal Differentiation*. JoVE, 2009(31): p. e1519.
- 659 35. West-Mays, J.A., G. Pino, and F.J. Lovicu, *Development and use of the lens epithelial explant system to study lens*  
660 *differentiation and cataractogenesis*. Progress in Retinal and Eye Research, 2010. **29**(2): p. 135-143.
- 661 36. Livak, K.J. and T.D. Schmittgen, *Analysis of Relative Gene Expression Data Using Real-Time Quantitative PCR and*  
662 *the 2- $\Delta\Delta$ CT Method*. Methods, 2001. **25**(4): p. 402-408.
- 663 37. Pendergrass, W., et al., *Accumulation of DNA, Nuclear and Mitochondrial Debris, and ROS at Sites of Age-Related*  
664 *Cortical Cataract in Mice*. Investigative Ophthalmology & Visual Science, 2005. **46**(12): p. 4661-4670.
- 665 38. *Western Blotting - A Beginner's Guide*, Abcam, Editor.
- 666 39. Lam, P.T., et al., *Considerations for the use of Cre recombinase for conditional gene deletion in the mouse lens*.  
667 Human Genomics, 2019. **13**(1): p. 10.
- 668 40. Raghunath, A., et al., *Antioxidant response elements: Discovery, classes, regulation and potential applications*.  
669 Redox Biology, 2018. **17**: p. 297-314.
- 670 41. Terrell, A.M., et al., *Molecular characterization of mouse lens epithelial cell lines and their suitability to study RNA*  
671 *granules and cataract associated genes*. Experimental Eye Research, 2015. **131**: p. 42-55.
- 672 42. Dudek, E.J., F. Shang, and A. Taylor, *H<sub>2</sub>O<sub>2</sub>-mediated oxidative stress activates NF- $\kappa$ B in lens epithelial cells*. Free  
673 Radical Biology and Medicine, 2001. **31**(5): p. 651-658.
- 674 43. Srivastava, S.K. and K.V. Ramana, *Focus on Molecules: Nuclear factor-kappaB*. Experimental Eye Research, 2009.  
675 **88**(1): p. 2-3.
- 676 44. Lingappan, K., *NF- $\kappa$ B in oxidative stress*. Current Opinion in Toxicology, 2018. **7**: p. 81-86.
- 677 45. Liu, T., et al., *NF- $\kappa$ B signaling in inflammation*. Signal Transduction and Targeted Therapy, 2017. **2**(1): p. 17023.
- 678 46. Basu, S., S. Rajakaruna, and A.S. Menko, *Insulin-like Growth Factor Receptor-1 and Nuclear Factor  $\kappa$ B Are Crucial*  
679 *Survival Signals That Regulate Caspase-3-mediated Lens Epithelial Cell Differentiation Initiation\**. Journal of  
680 Biological Chemistry, 2012. **287**(11): p. 8384-8397.
- 681 47. Li, C., et al., *GDF15 promotes EMT and metastasis in colorectal cancer*. Oncotarget, 2015. **7**(1).
- 682 48. Li, X., et al., *A CCL2/ROS autoregulation loop is critical for cancer-associated fibroblasts-enhanced tumor growth*  
683 *of oral squamous cell carcinoma*. Carcinogenesis, 2014. **35**(6): p. 1362-1370.
- 684 49. Li, J., et al., *JNK1/ $\beta$ -catenin axis regulates H<sub>2</sub>O<sub>2</sub>-induced epithelial-to-mesenchymal transition in human lens*  
685 *epithelial cells*. Biochemical and Biophysical Research Communications, 2019. **511**(2): p. 336-342.
- 686 50. Walker, J.L. and A.S. Menko, *Immune cells in lens injury repair and fibrosis*. Experimental Eye Research, 2021. **209**:  
687 p. 108664.
- 688 51. Upreti, A., et al., *Transcriptome analysis of lens epithelial explants upon vitreous-induced fiber cell differentiation*.  
689 Investigative Ophthalmology & Visual Science, 2021. **62**(8): p. 2083-2083.
- 690 52. Osada, H., et al., *Ultraviolet B-induced expression of amphiregulin and growth differentiation factor 15 in human*  
691 *lens epithelial cells*. Molecular vision, 2011. **17**: p. 159-169.
- 692 53. Borish, L.C. and J.W. Steinke, 2. *Cytokines and chemokines*. Journal of Allergy and Clinical Immunology, 2003.  
693 **111**(2, Supplement 2): p. S460-S475.
- 694 54. Asensio, V.C., et al., *C10 Is a Novel Chemokine Expressed in Experimental Inflammatory Demyelinating Disorders*  
695 *that Promotes Recruitment of Macrophages to the Central Nervous System*. The American Journal of Pathology,  
696 1999. **154**(4): p. 1181-1191.
- 697 55. Bystry, R.S., et al., *B cells and professional APCs recruit regulatory T cells via CCL4*. Nature Immunology, 2001.  
698 **2**(12): p. 1126-1132.
- 699 56. Proost, P., A. Wuyts, and J. van Damme, *Human monocyte chemotactic proteins-2 and -3: structural and functional*  
700 *comparison with MCP-1*. Journal of Leukocyte Biology, 1996. **59**(1): p. 67-74.
- 701 57. Gschwandtner, M., R. Derler, and K.S. Midwood, *More Than Just Attractive: How CCL2 Influences Myeloid Cell*  
702 *Behavior Beyond Chemotaxis*. Frontiers in Immunology, 2019. **10**(2759).

- 703 58. Bleul, C.C., et al., *A highly efficacious lymphocyte chemoattractant, stromal cell-derived factor 1 (SDF-1)*. Journal of Experimental Medicine, 1996. **184**(3): p. 1101-1109.
- 704
- 705 59. Zhao, Y., D. Zheng, and A. Cvekl, *Profiling of chromatin accessibility and identification of general cis-regulatory mechanisms that control two ocular lens differentiation pathways*. Epigenetics & Chromatin, 2019. **12**(1): p. 27.
- 706
- 707 60. Hoang, T.V., et al., *Comparative transcriptome analysis of epithelial and fiber cells in newborn mouse lenses with RNA sequencing*. Molecular vision, 2014. **20**: p. 1491-1517.
- 708
- 709 61. Zhao, Y., D. Zheng, and A. Cvekl, *A comprehensive spatial-temporal transcriptomic analysis of differentiating nascent mouse lens epithelial and fiber cells*. Experimental Eye Research, 2018. **175**: p. 56-72.
- 710
- 711 62. García-Giménez, J.-L., et al., *Oxidative stress-mediated alterations in histone post-translational modifications*. Free Radical Biology and Medicine, 2021. **170**: p. 6-18.
- 712
- 713 63. Tomita, K., P.J. Barnes, and I.M. Adcock, *The effect of oxidative stress on histone acetylation and IL-8 release*. Biochemical and Biophysical Research Communications, 2003. **301**(2): p. 572-577.
- 714
- 715 64. Ito, K., et al., *Cigarette smoking reduces histone deacetylase 2 expression, enhances cytokine expression, and inhibits glucocorticoid actions in alveolar macrophages*. The FASEB Journal, 2001. **15**(6): p. 1110-1112.
- 716
- 717 65. Gilmour, P.S., et al., *Histone acetylation regulates epithelial IL-8 release mediated by oxidative stress from environmental particles*. American Journal of Physiology-Lung Cellular and Molecular Physiology, 2003. **284**(3): p. L533-L540.
- 718
- 719
- 720 66. Rahman, I., et al., *Oxidative stress and TNF- $\alpha$  induce histone Acetylation and NF- $\kappa$ B/AP-1 activation in Alveolar epithelial cells: Potential mechanism In gene transcription in lung inflammation*, in *Oxygen/Nitrogen Radicals: Cell Injury and Disease*, V. Vallyathan, X. Shi, and V. Castranova, Editors. 2002, Springer US: Boston, MA. p. 239-248.
- 721
- 722
- 723 67. Tigano, M., et al., *Nuclear sensing of breaks in mitochondrial DNA enhances immune surveillance*. Nature, 2021. **591**(7850): p. 477-481.
- 724
- 725 68. Szczesny, B., et al., *Mitochondrial DNA damage and subsequent activation of Z-DNA binding protein 1 links oxidative stress to inflammation in epithelial cells*. Scientific Reports, 2018. **8**(1): p. 914.
- 726
- 727 69. Winterberg, P.D., et al., *Reactive oxygen species and IRF1 stimulate IFN $\alpha$  production by proximal tubules during ischemic AKI*. American Journal of Physiology-Renal Physiology, 2013. **305**(2): p. F164-F172.
- 728
- 729 70. Catani, M.V., et al., *Nuclear factor  $\kappa$ B and activating protein 1 are involved in differentiation-related resistance to oxidative stress in skeletal muscle cells*. Free Radical Biology and Medicine, 2004. **37**(7): p. 1024-1036.
- 730
- 731 71. Zgheib, C., et al., *Acyloxy Nitroso Compounds Inhibit LIF Signaling in Endothelial Cells and Cardiac Myocytes: Evidence That STAT3 Signaling Is Redox-Sensitive*. PLOS ONE, 2012. **7**(8): p. e43313.
- 732
- 733 72. Biswas, S.K., *Does the Interdependence between Oxidative Stress and Inflammation Explain the Antioxidant Paradox?* Oxidative Medicine and Cellular Longevity, 2016. **2016**: p. 5698931.
- 734
- 735 73. Zheng, Q., et al., *Reactive oxygen species activated NLRP3 inflammasomes initiate inflammation in hyperosmolarity stressed human corneal epithelial cells and environment-induced dry eye patients*. Experimental Eye Research, 2015. **134**: p. 133-140.
- 736
- 737
- 738 74. Liu, Y.-C., et al., *Changes in aqueous oxidative stress, prostaglandins, and cytokines: Comparisons of low-energy femtosecond laser-assisted cataract surgery versus conventional phacoemulsification*. Journal of Cataract & Refractive Surgery, 2019. **45**(2).
- 739
- 740
- 741 75. Taravati, P., et al., *Postcataract surgical inflammation*. Current Opinion in Ophthalmology, 2012. **23**(1).
- 742
- 743 76. Dua, H. and R. Attre, *Treatment of Post-operative inflammation following Cataract Surgery - A Review*. European Ophthalmic Review, 2012. **6**(2): p. 98-103.
- 744
- 745 77. Müllner-Eidenböck, A., et al., *Cellular reaction on the anterior surface of 4 types of intraocular lenses*. Journal of Cataract & Refractive Surgery, 2001. **27**(5).
- 746
- 747 78. Baum, J. and H.S. Duffy, *Fibroblasts and Myofibroblasts: What Are We Talking About?* Journal of Cardiovascular Pharmacology, 2011. **57**(4).
- 748
- 749 79. Krausgruber, T., et al., *Structural cells are key regulators of organ-specific immune responses*. Nature, 2020. **583**(7815): p. 296-302.
- 750
- 751 80. Medvedovic, M., et al., *Gene expression and discovery during lens regeneration in mouse: regulation of epithelial to mesenchymal transition and lens differentiation*. Mol Vis, 2006. **12**: p. 422-40.
- 752
- 753 81. Li, Y., et al., *Macrophage recruitment in immune-privileged lens during capsule repair, necrotic fiber removal, and fibrosis*. iScience, 2021. **24**(6): p. 102533.
- 754
- 755 82. Shu, D.Y. and F.J. Lovicu, *Myofibroblast transdifferentiation: The dark force in ocular wound healing and fibrosis*. Progress in Retinal and Eye Research, 2017. **60**: p. 44-65.
- 756
- 757 83. Walker, J.L., et al., *Unique precursors for the mesenchymal cells involved in injury response and fibrosis*. Proceedings of the National Academy of Sciences, 2010. **107**(31): p. 13730.

- 758 84. Wallentin, N., B. Lundgren, and C. Lundberg, *Lack of correlation between intraocular inflammation and after-*  
759 *cataract formation in the rabbit eye*. Journal of Cataract & Refractive Surgery, 2000. **26**(9).
- 760 85. Symonds, J.G., F.J. Lovicu, and C.G. Chamberlain, *Differing effects of dexamethasone and diclofenac on posterior*  
761 *capsule opacification-like changes in a rat lens explant model*. Experimental Eye Research, 2006. **83**(4): p. 771-  
762 782.
- 763 86. Laurell, C.G. and C. Zetterström, *Effects of dexamethasone, diclofenac, or placebo on the inflammatory response*  
764 *after cataract surgery*. British Journal of Ophthalmology, 2002. **86**(12): p. 1380.
- 765 87. Hecht, I., et al., *Anti-inflammatory Medication After Cataract Surgery and Posterior Capsular Opacification*.  
766 American Journal of Ophthalmology, 2020. **215**: p. 104-111.
- 767 88. Nibourg, L.M., et al., *Prevention of posterior capsular opacification*. Experimental Eye Research, 2015. **136**: p. 100-  
768 115.
- 769 89. Zaczek, A., C.-G. Laurell, and C. Zetterström, *Posterior capsule opacification after phacoemulsification in patients*  
770 *with postoperative steroidal and nonsteroidal treatment*. Journal of Cataract & Refractive Surgery, 2004. **30**(2).
- 771 90. Adachi, M., et al., *Nonsteroidal anti-inflammatory drugs and oxidative stress in cancer cells*. Histology and  
772 histopathology, 2007. **22**(4): p. 437-442.
- 773 91. Liu, W., et al., *Dexamethasone-induced production of reactive oxygen species promotes apoptosis via endoplasmic*  
774 *reticulum stress and autophagy in MC3T3-E1 cells*. Int J Mol Med, 2018. **41**(4): p. 2028-2036.
- 775 92. Feng, Y.-L. and X.-L. Tang, *Effect of glucocorticoid-induced oxidative stress on the expression of Cbfa1*. Chemico-  
776 Biological Interactions, 2014. **207**: p. 26-31.
- 777 93. Schäfer, S.C., et al., *Dexamethasone suppresses eNOS and CAT-1 and induces oxidative stress in mouse resistance*  
778 *arterioles*. American Journal of Physiology-Heart and Circulatory Physiology, 2005. **288**(1): p. H436-H444.
- 779 94. Smith, A.J.O., J.A. Eldred, and I.M. Wormstone, *Resveratrol Inhibits Wound Healing and Lens Fibrosis: A Putative*  
780 *Candidate for Posterior Capsule Opacification Prevention*. Investigative Ophthalmology & Visual Science, 2019.  
781 **60**(12): p. 3863-3877.
- 782 95. Ursell, P.G., et al., *5 year incidence of YAG capsulotomy and PCO after cataract surgery with single-piece monofocal*  
783 *intraocular lenses: a real-world evidence study of 20,763 eyes*. Eye, 2020. **34**(5): p. 960-968.

784

785

786

787

788

789

790

791

792

793

794

795

796

797





Figure 2.

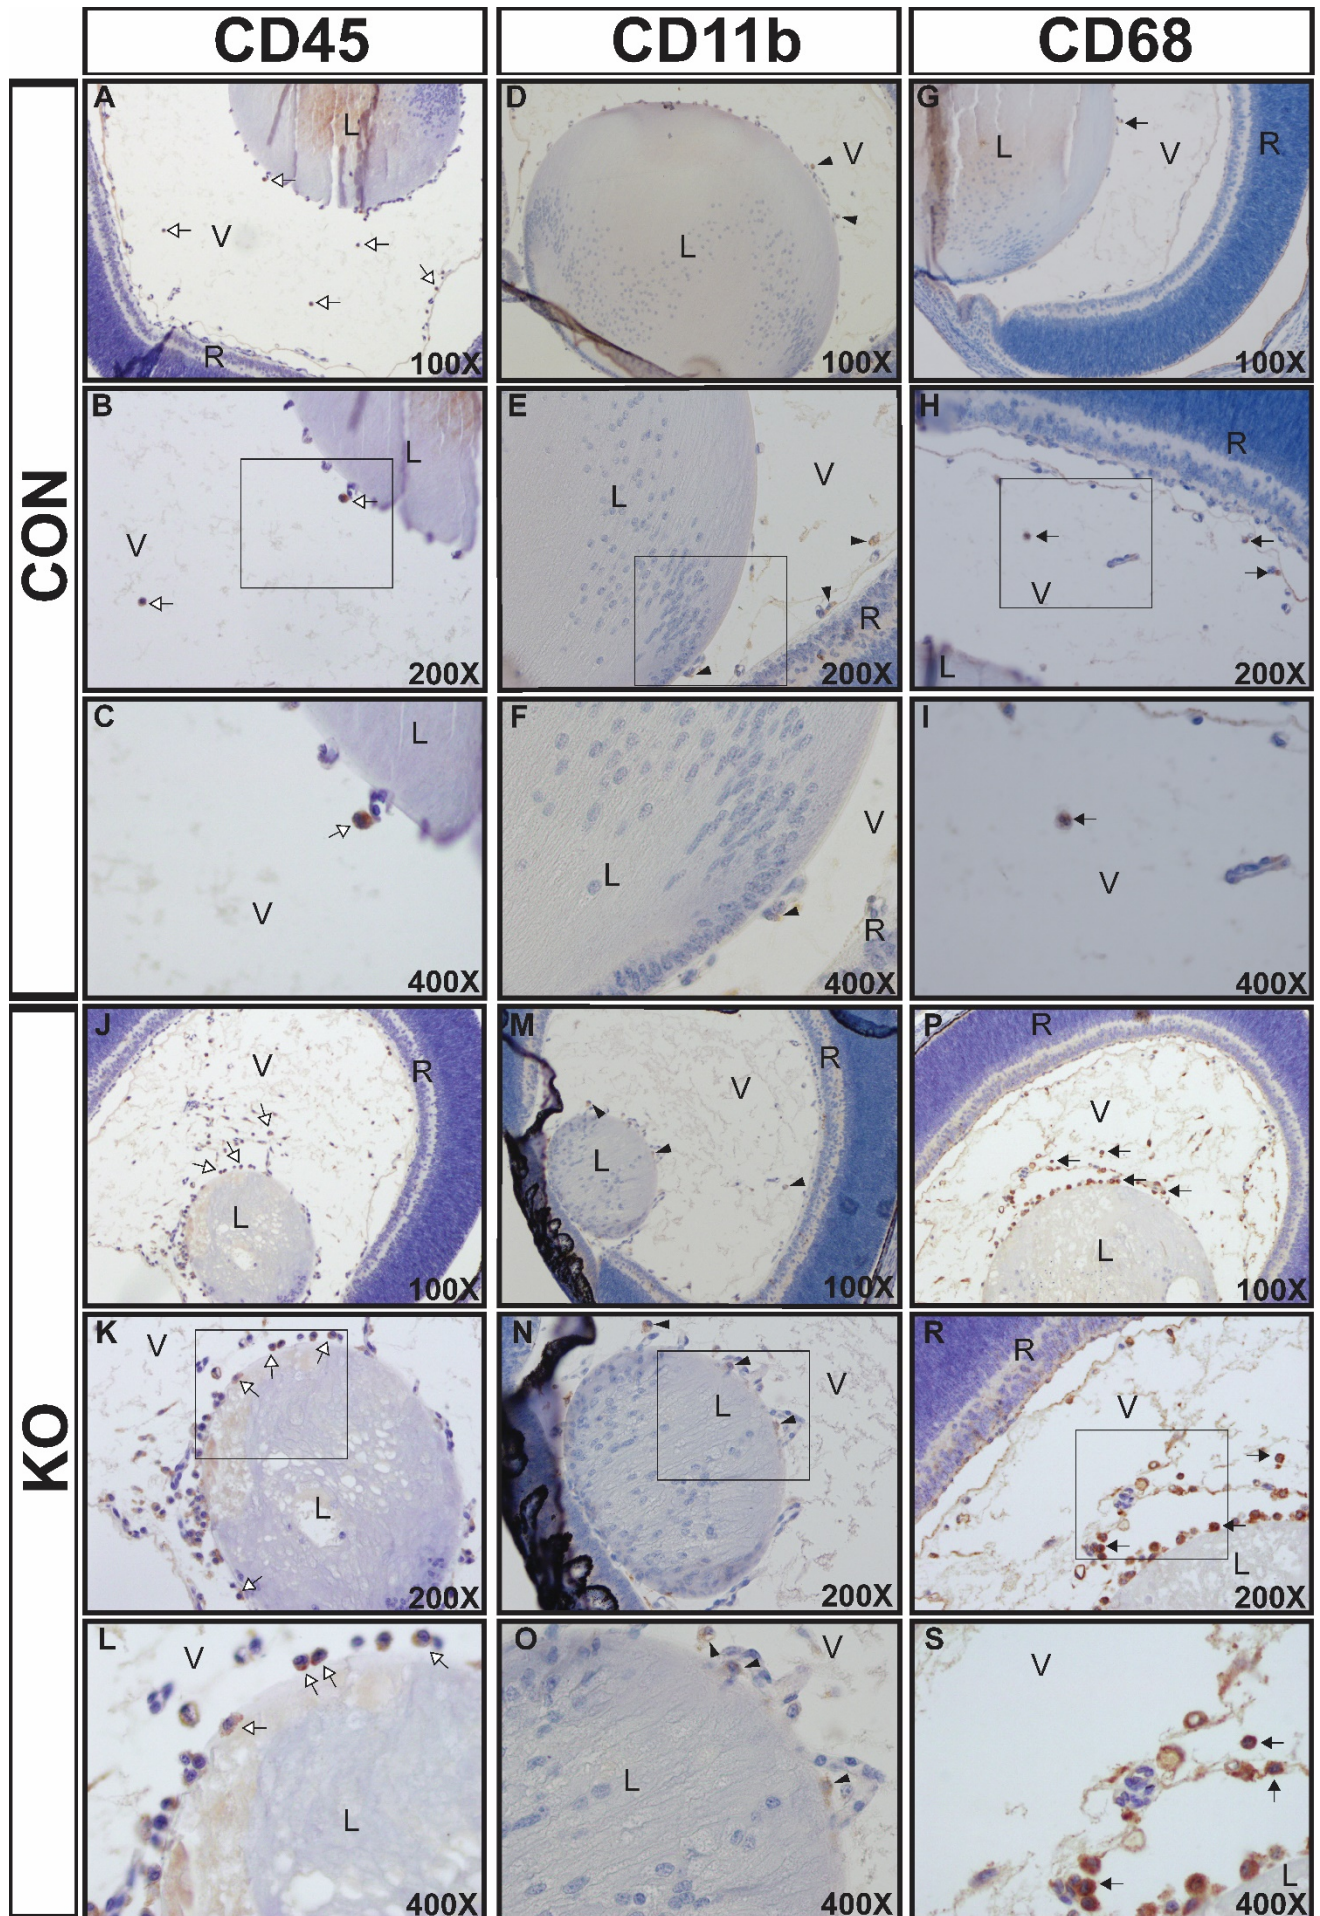

82 **Figure 3.**

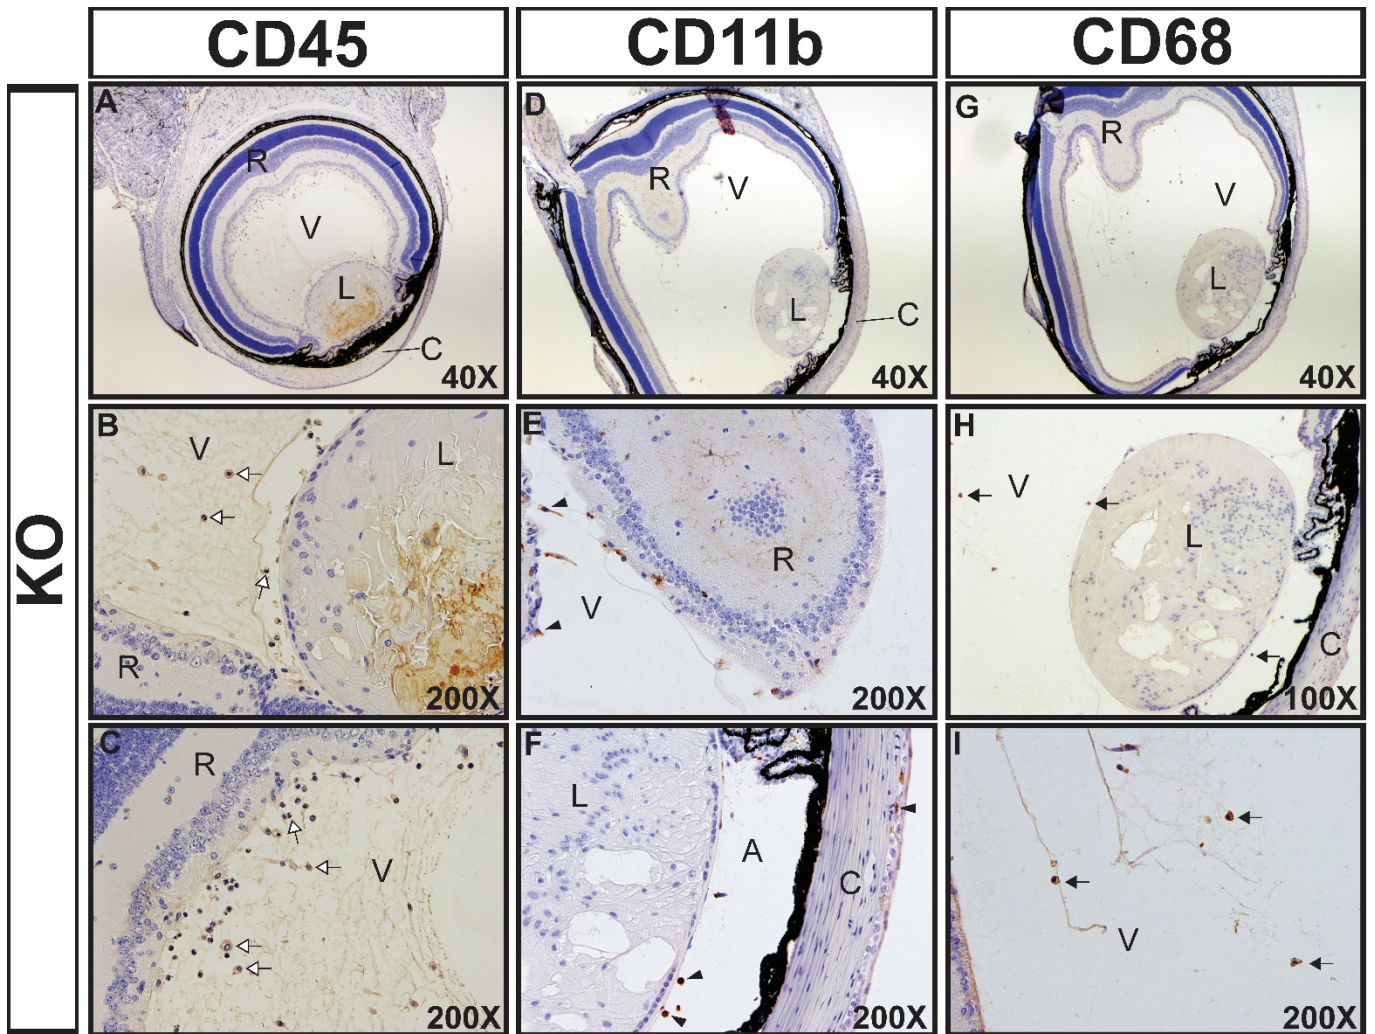

827

828

829

830

831

832

833

834

835

836

837

Figure 4.

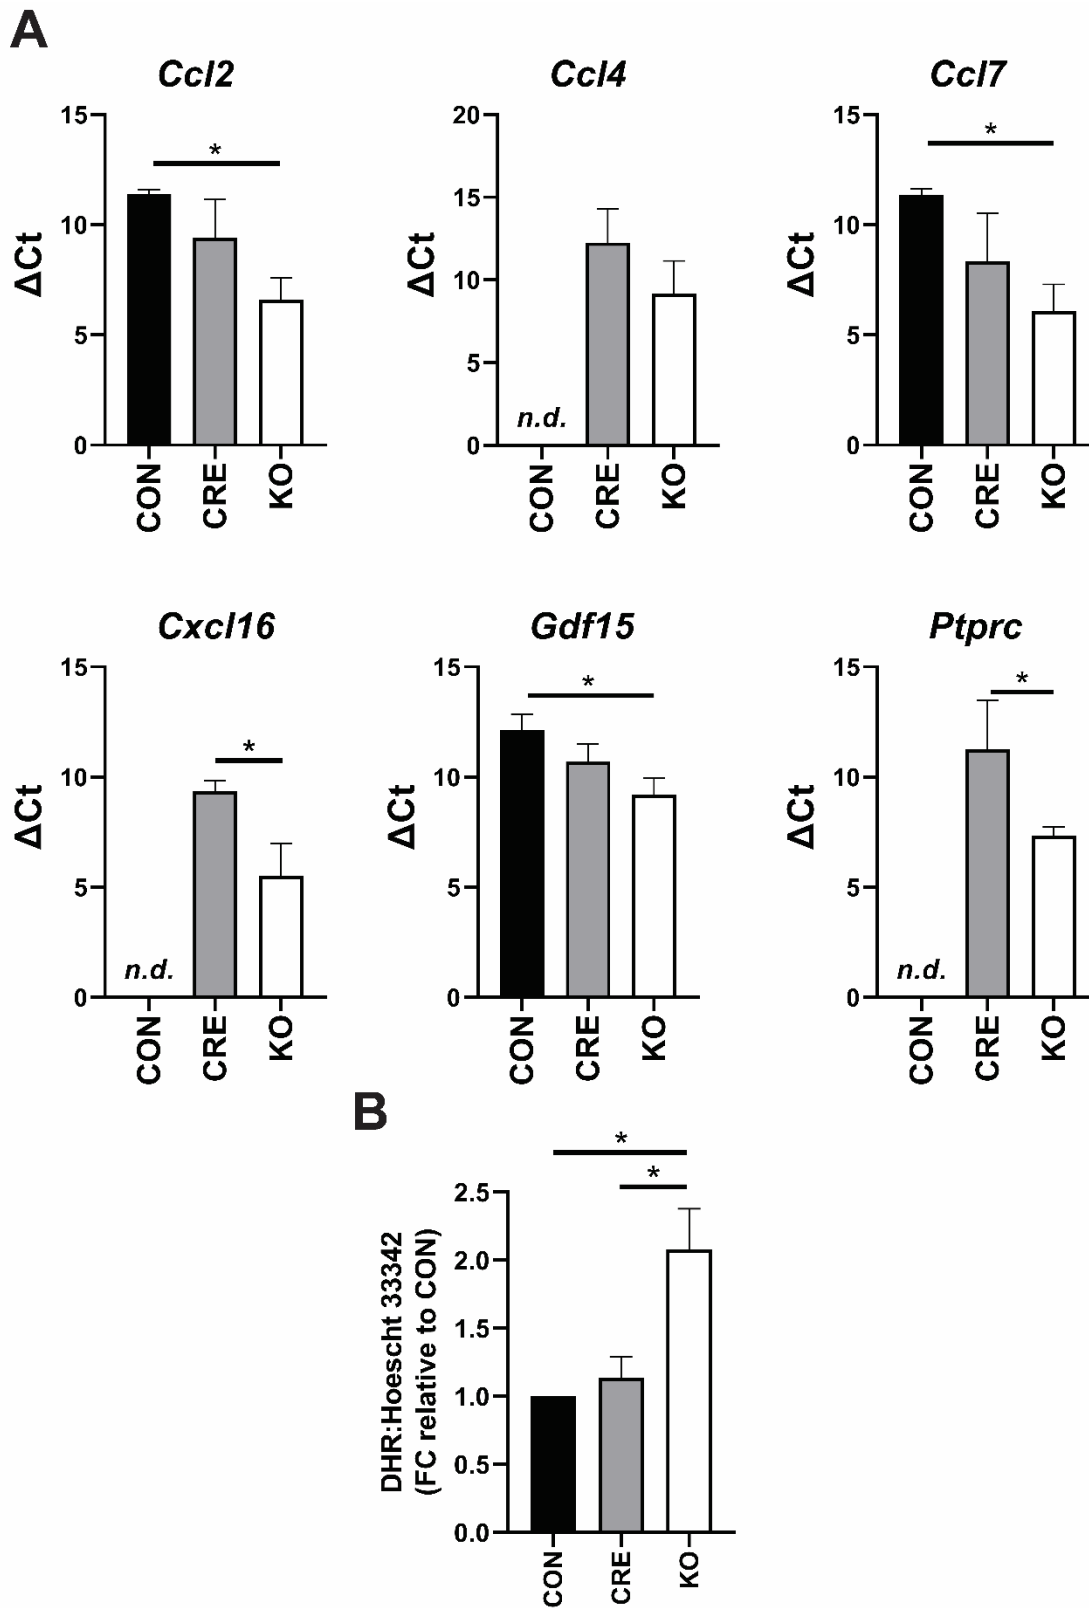

**Figure 5.**

839

**A**

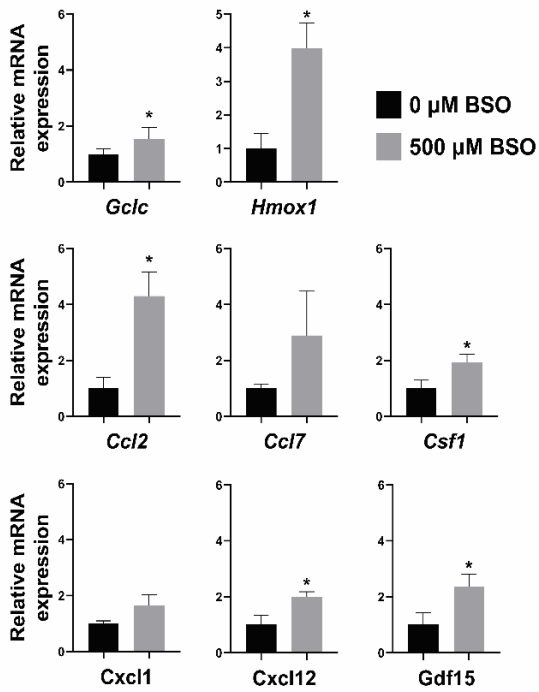

**B**

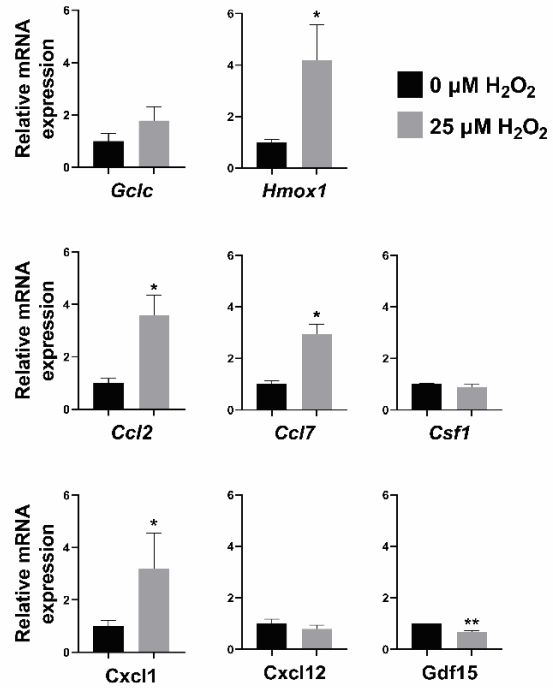

**C**

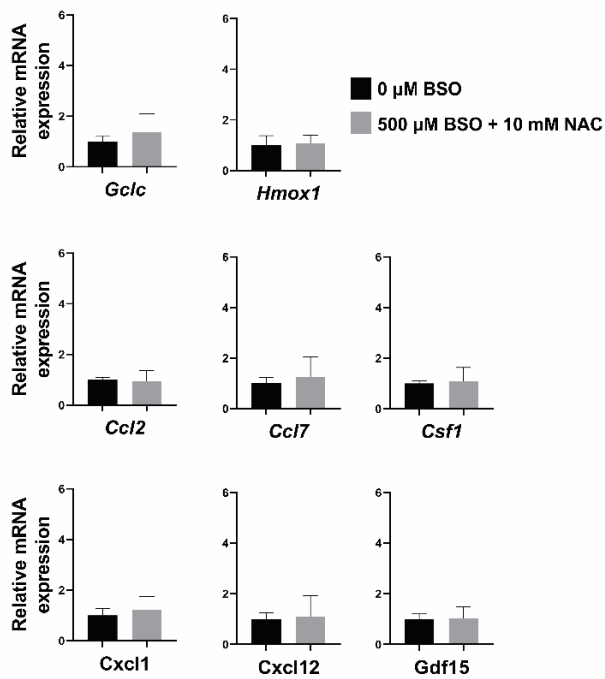

**D**

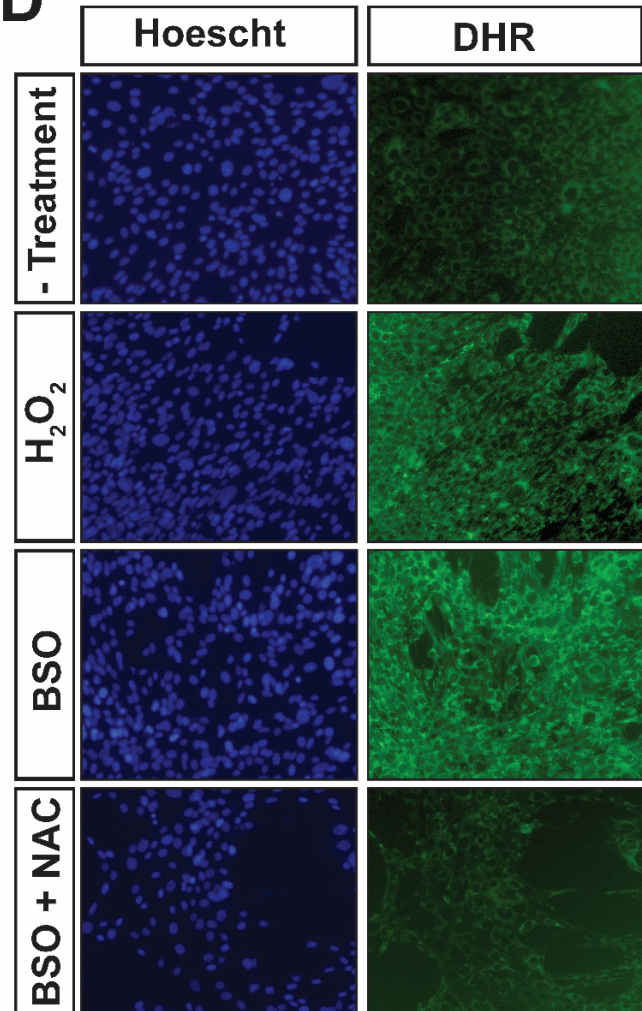

**Figure 6.**

840

841

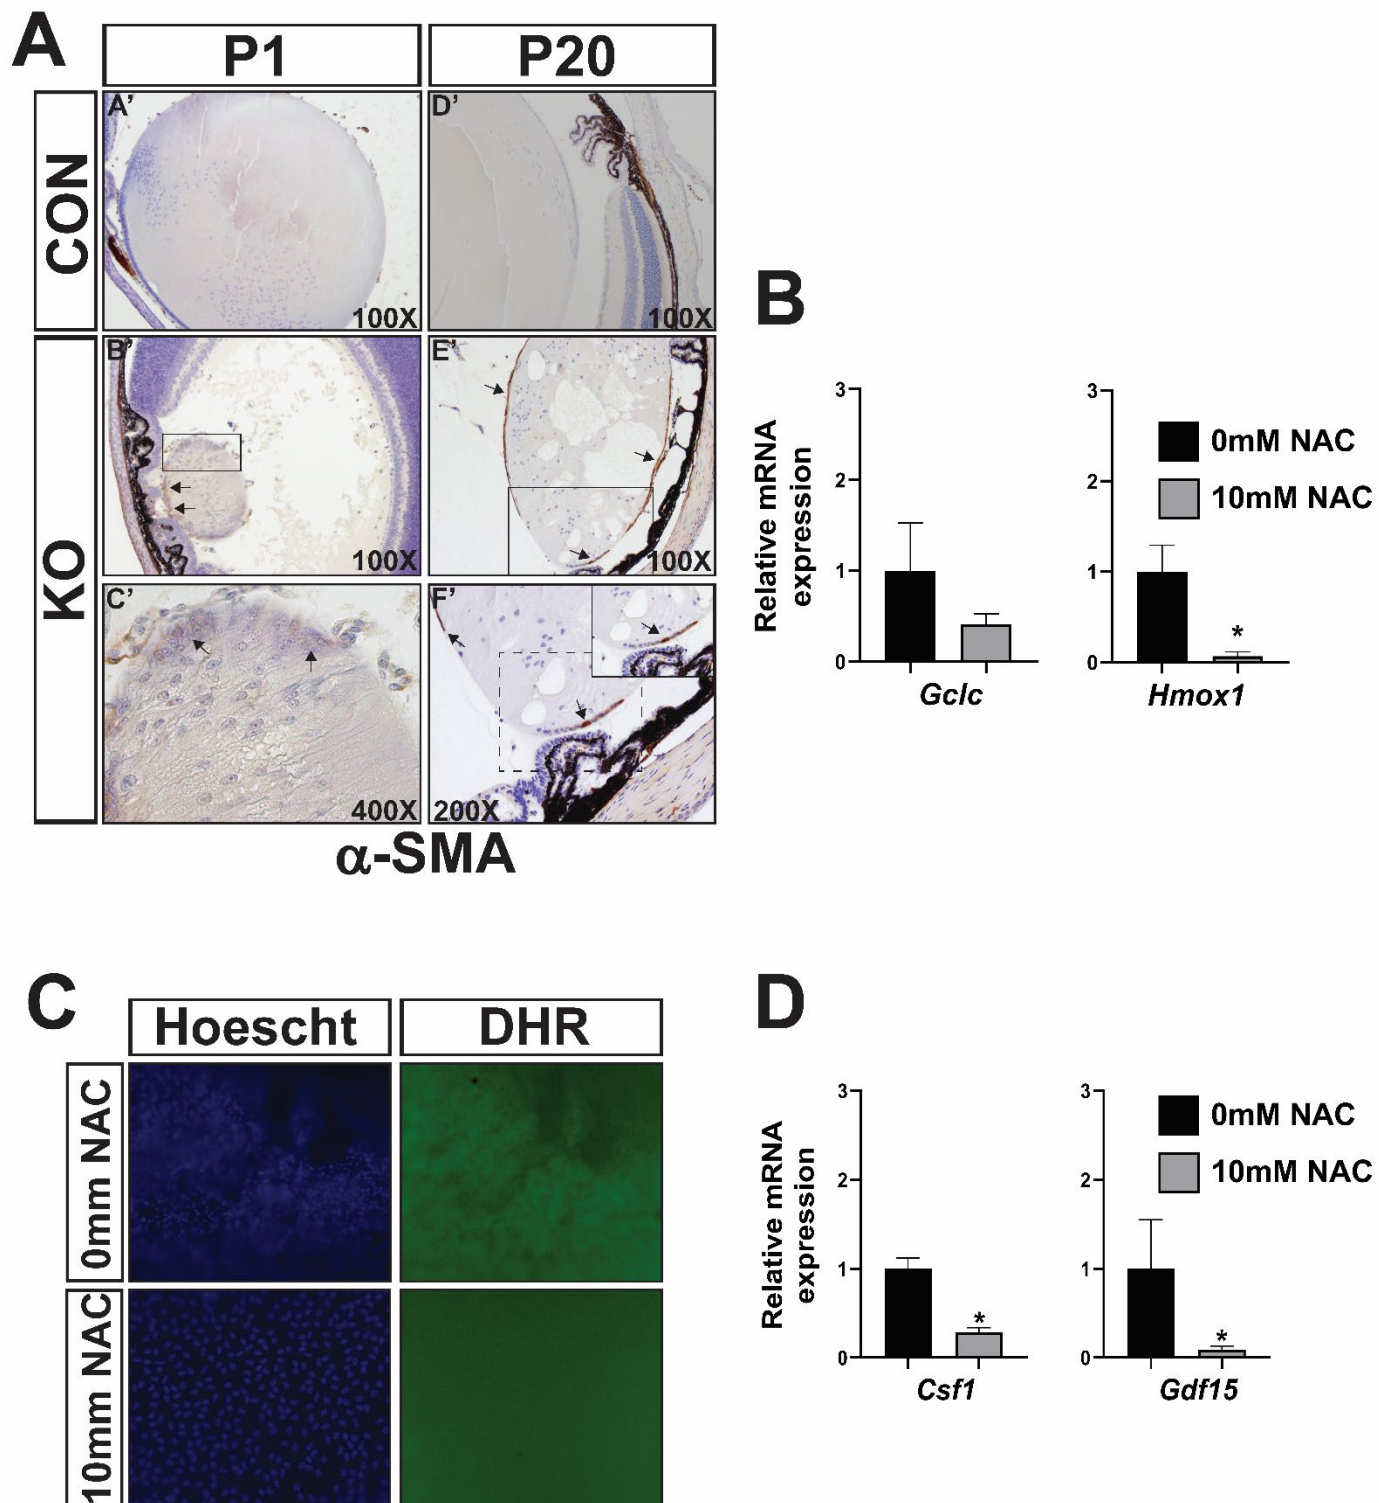

842

843

844 **Figure 7.**

845

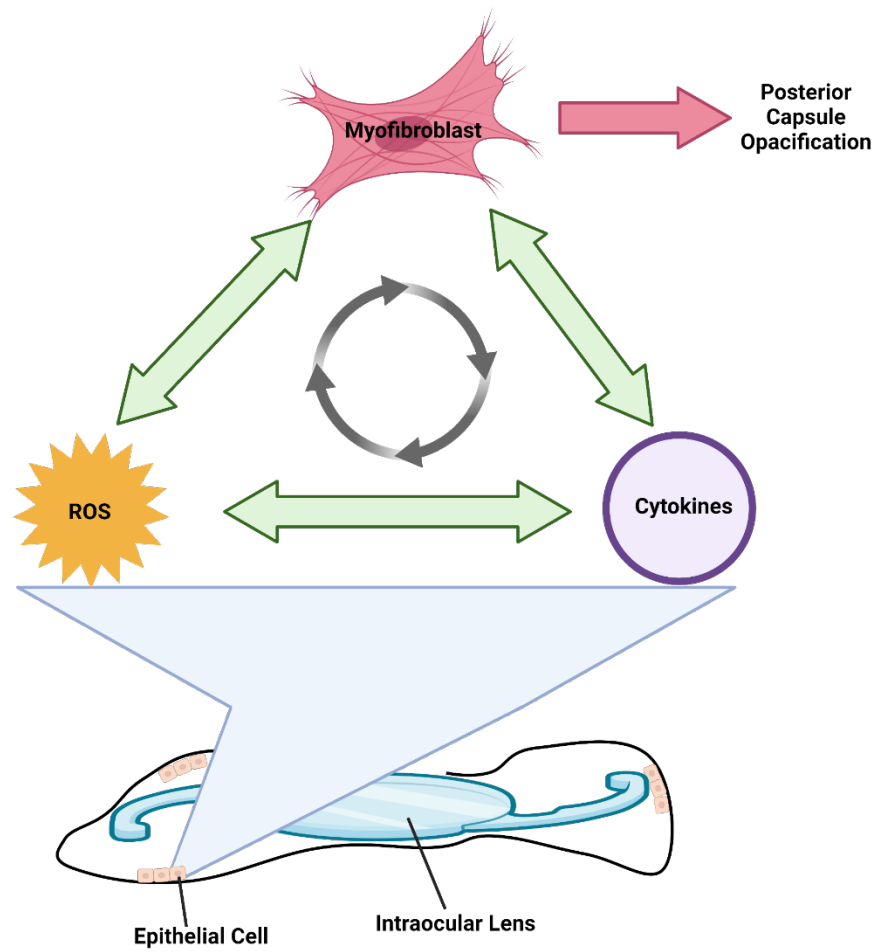

846

847

848

849

850

851

### Supplemental Figure 1.

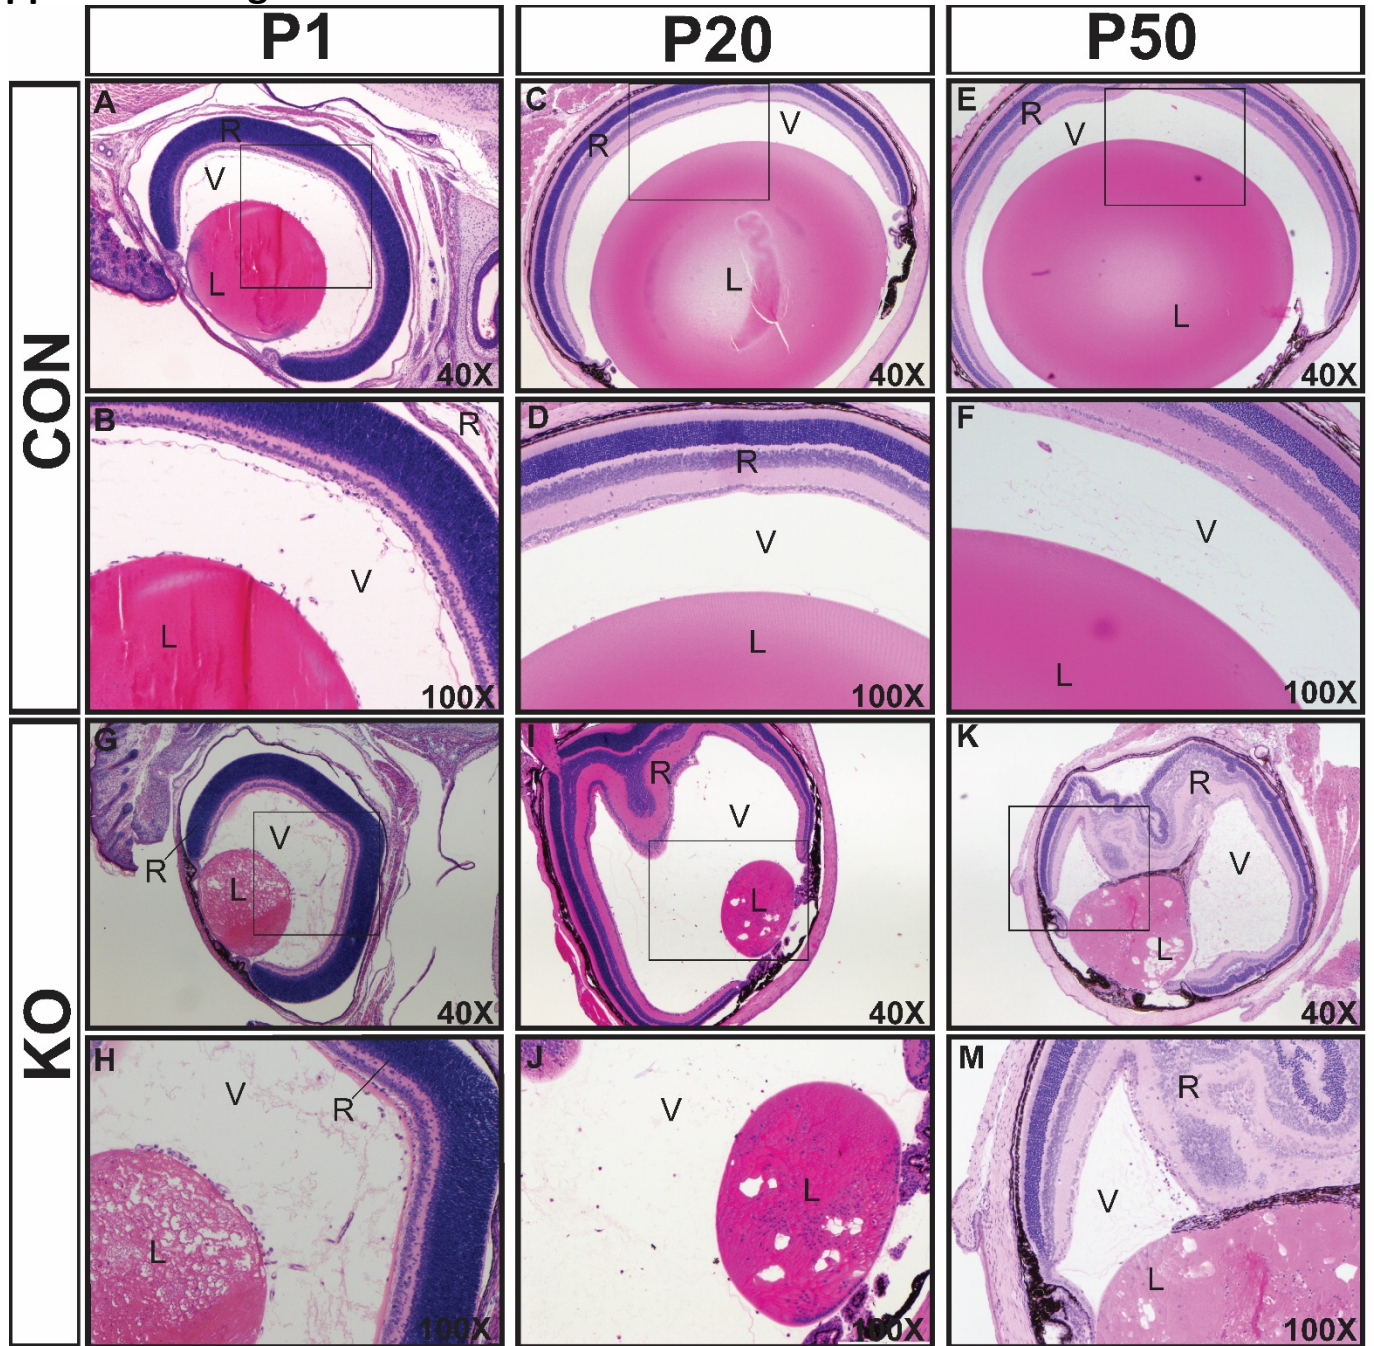

852

853

854

855

856

857

858

859

## Supplemental Figure 2.

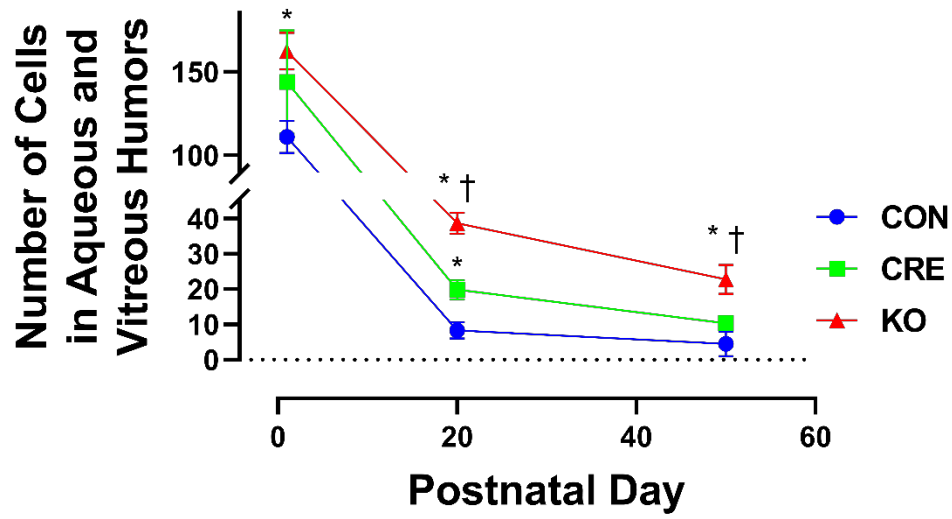

860



### Supplemental Figure 3.

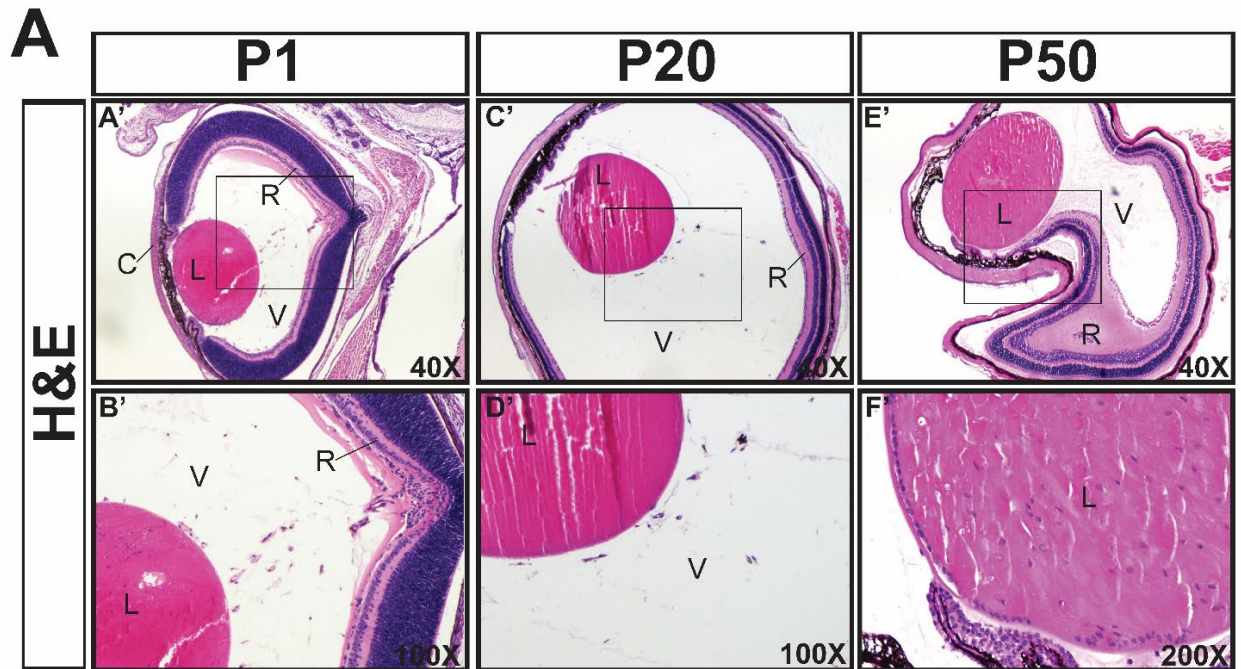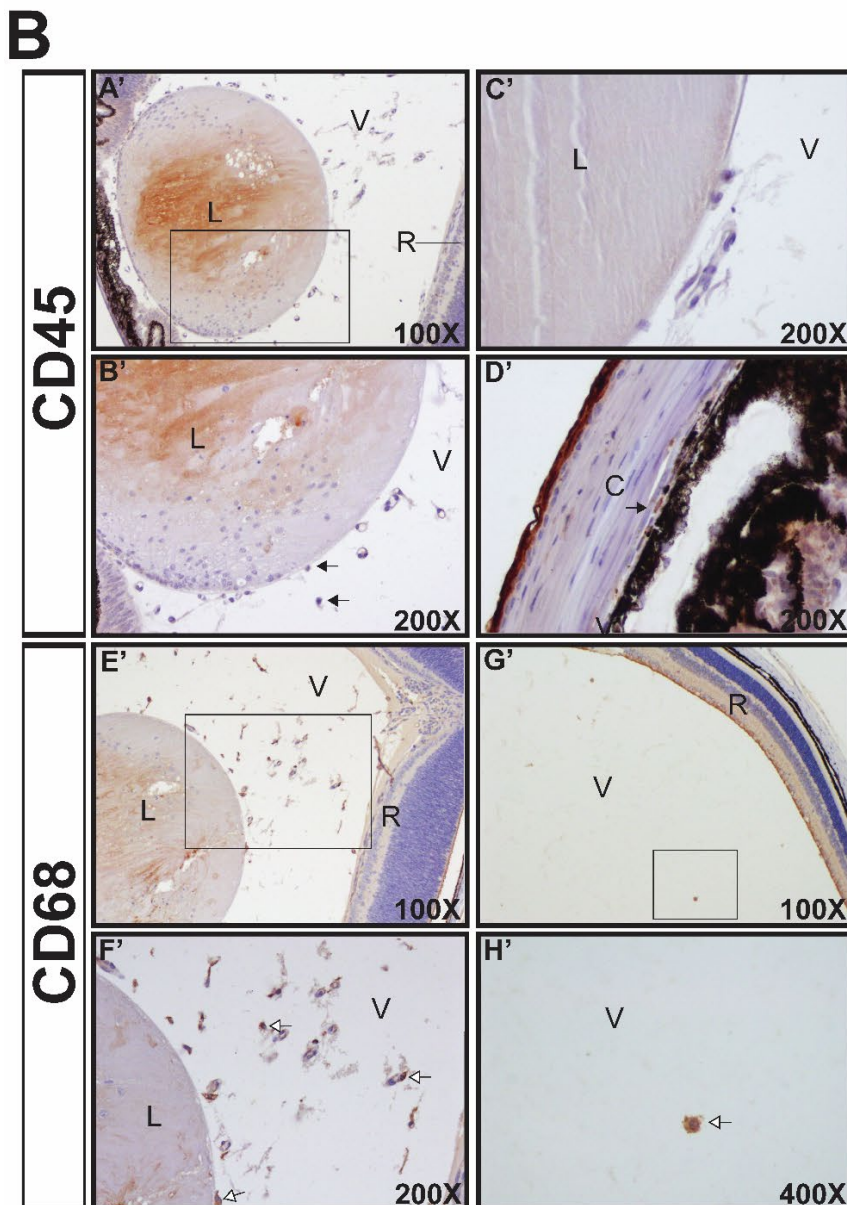

862 **Supplemental Figure 4.**

**A**

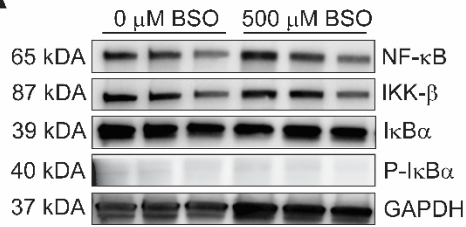

**B**

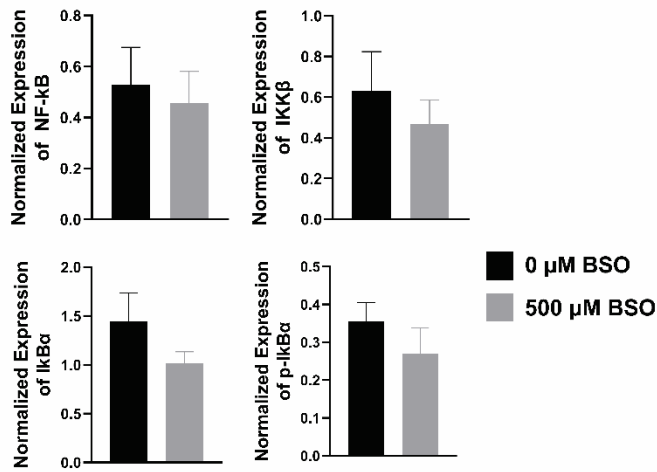

**C**

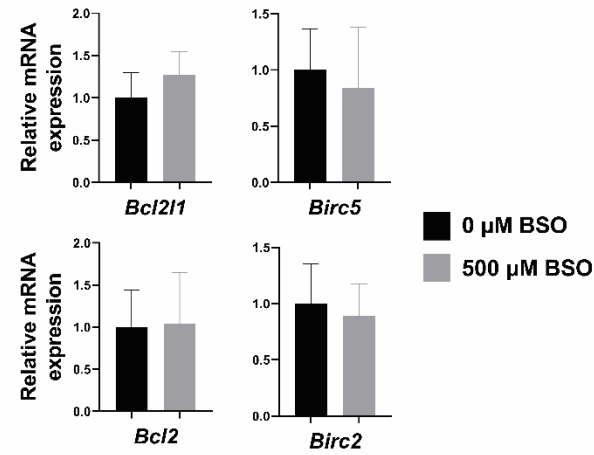

**D**

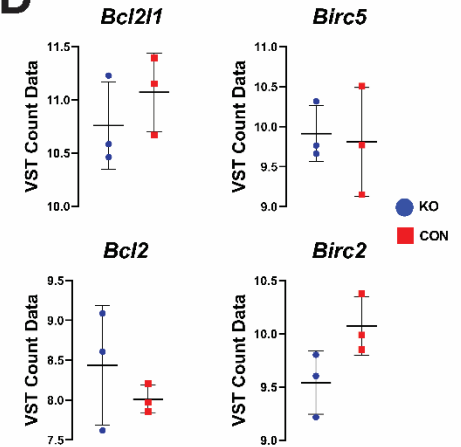

863

864

865

866

867

868

869

870

871

872

873

874

## Supplemental Figure 5.

875

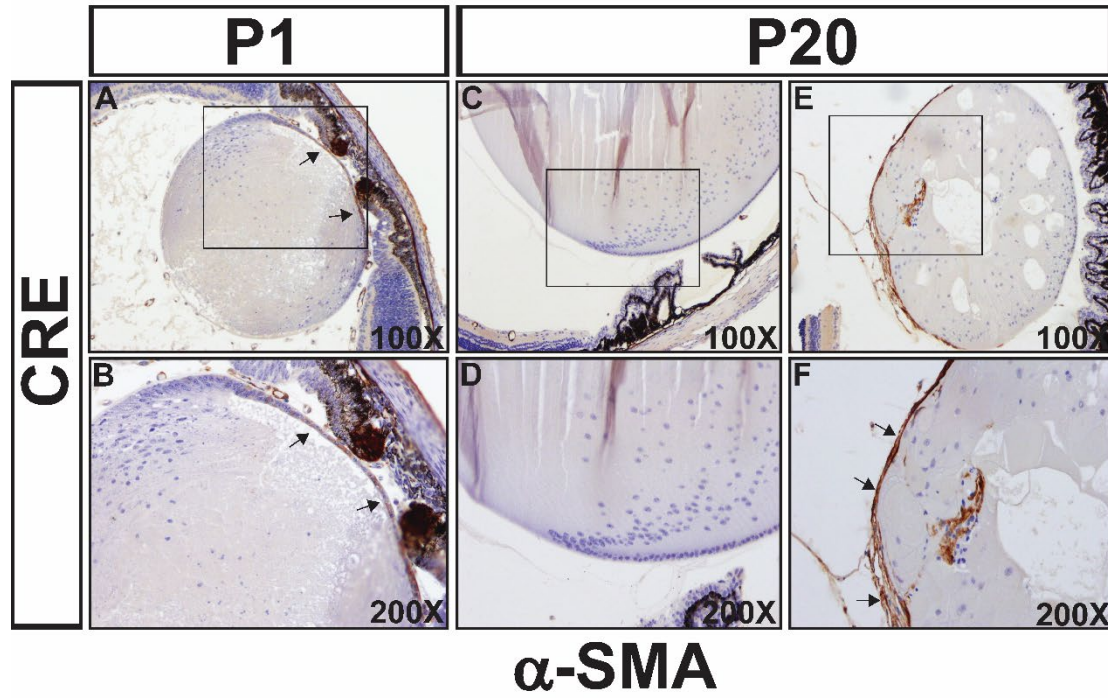

876

877

878

879

880

881

882

883

884

885

886

887

888

889

## Supplemental Figure 6.

890

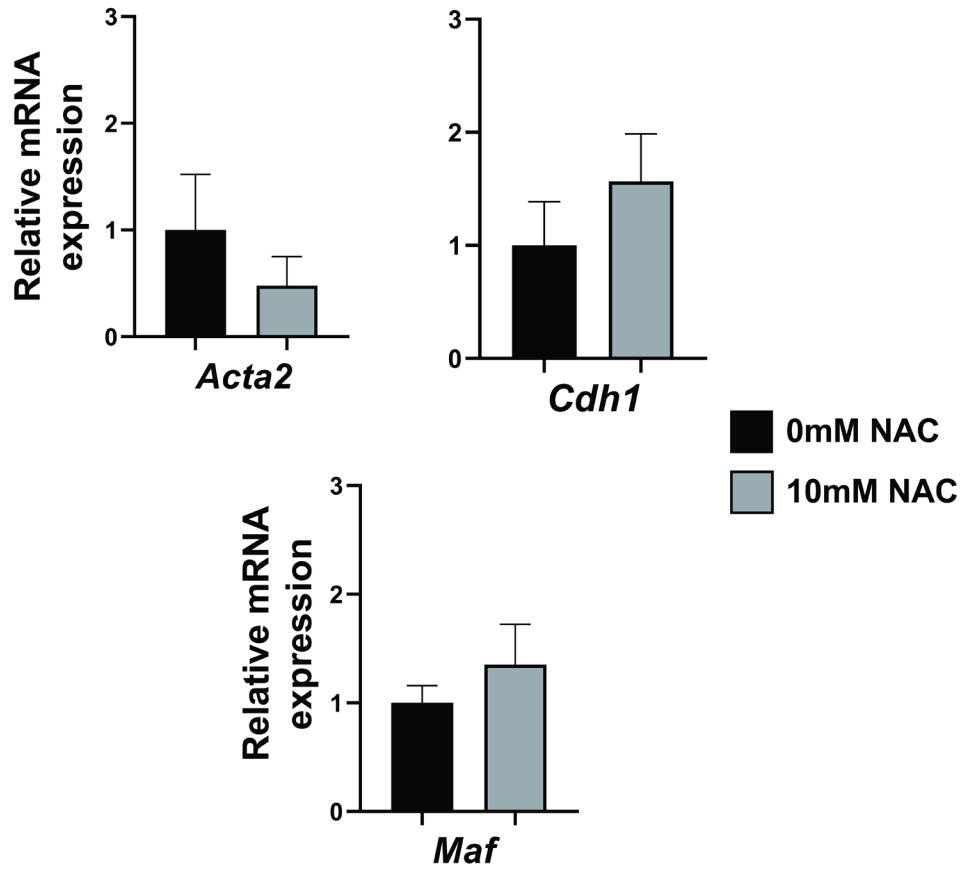

891

892

893

894

895

896

897

898

899

900

901

902

## Supplemental Figure 7.

903

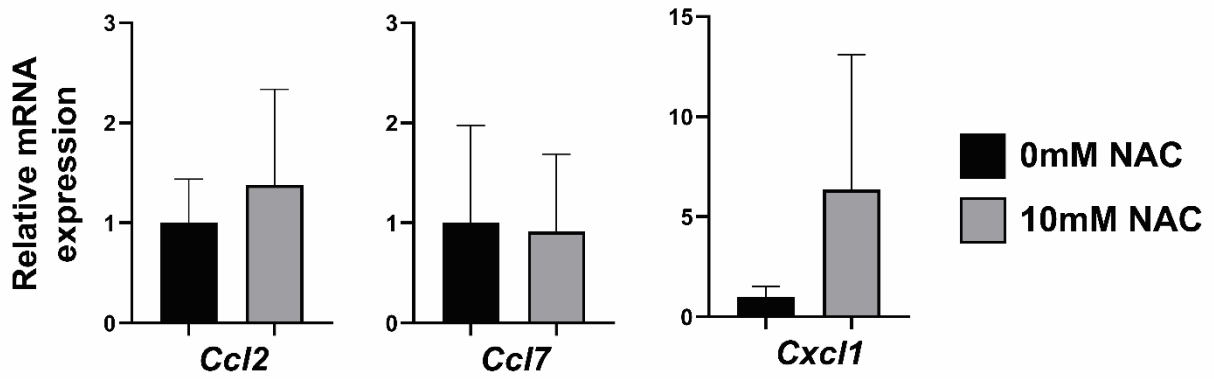

904

905

906

907

908

909
